# The conserved regulatory basis of mRNA contributions to the early *Drosophila* embryo differs between the maternal and zygotic genomes

Charles S. Omura\* and Susan E. Lott\*

Department of Evolution and Ecology, University of California, Davis CA 95616

\*Corresponding Authors, e-mail: [csumura@ucdavis.edu](mailto:csumura@ucdavis.edu) (CSO), [selott@ucdavis.edu](mailto:selott@ucdavis.edu) (SEL)

## 1 Abstract

2 The gene products that drive early development are critical for setting up developmental trajectories in  
3 all animals. The earliest stages of development are fueled by maternally provided mRNAs until the  
4 zygote can take over transcription of its own genome. In early development, both maternally deposited  
5 and zygotically transcribed gene products have been well characterized in model systems. Previously,  
6 we demonstrated that across the genus *Drosophila*, maternal and zygotic mRNAs are largely conserved  
7 but also showed a surprising amount of change across species, with more differences evolving at the  
8 zygotic stage than the maternal stage. In this study, we use comparative methods to elucidate the  
9 regulatory mechanisms underlying maternal deposition and zygotic transcription across species.  
10 Through motif analysis, we discovered considerable conservation of regulatory mechanisms associated  
11 with maternal transcription, as compared to zygotic transcription. We also found that the regulatory  
12 mechanisms active in the two genomes, maternal versus zygotic, are quite different. For maternally  
13 deposited genes, we uncovered many signals that are consistent with transcriptional regulation through  
14 control at the level of chromatin through factors enriched in the ovary, rather than precisely controlled  
15 gene-specific factors. For genes expressed only by the zygotic genome, we found evidence for previously  
16 identified regulators such as Zelda and GAGA-factor, with multiple analyses pointing toward gene-  
17 specific regulation. The observed mechanisms of regulation are consistent with what is known about  
18 regulation in these two genomes: during oogenesis, the maternal genome is optimized to quickly  
19 produce a large volume of transcripts to provide to the oocyte; after zygotic genome activation,  
20 mechanisms are employed to activate transcription of specific genes in a spatiotemporally precise  
21 manner. Thus the genetic architecture of the maternal and zygotic genomes and the specific  
22 requirements for the transcripts present at each stage of embryogenesis determine the regulatory  
23 mechanisms responsible for transcripts present at these stages.

## 24 Author summary

25 Early development in animals is a unique period of time, as it is controlled by gene products from two  
26 different genomes: that of the mother and that of the zygote. The earliest stages of development are  
27 directed by maternal mRNAs and proteins that are deposited into the egg, and only later does the  
28 zygote take over the transcription of its own genome. In this paper, we use data from 11 fruit fly species  
29 characterizing all the genes transcribed by the mother and later by the zygote, to investigate how  
30 transcription is regulated in the maternal and zygotic genomes. While we find some conserved  
31 regulatory elements at both stages, regulation of maternal transcription is much more highly conserved  
32 across species. We present evidence that maternal transcription is controlled in large co-regulated  
33 chromatin domains, while zygotic transcription is much more gene-specific. These results make sense in  
34 the context of where these genes are being transcribed, as maternal transcripts are generated in  
35 support cells which churn out a large amount of mRNA during oogenesis, while zygotic genes are often  
36 transcribed in a particular time and place in the embryo.

37

38

39

## 40 Introduction

41 Development is a sequential process, where each step builds on the one before it. The earliest stages of  
42 embryonic development are therefore critical, as processes such as cleavage cycles and the beginnings  
43 of axial patterning become the basis for all subsequent developmental processes. Regulation of these  
44 important tasks is controlled by mRNAs and proteins, and perhaps unsurprisingly then, mRNA levels in  
45 *Drosophila* are found to be precisely controlled during early embryogenesis[1,2]. This precise control of

46 transcript levels is especially remarkable, given that the transcripts at early stages of development come  
47 from two different genomes. The first set of transcripts are those deposited into the egg by the mother,  
48 while the second set are transcribed from the zygotic genome[3–5]. However, the regulatory  
49 mechanisms responsible for this precise control are not yet fully understood.

50 During oogenesis, the oocyte itself is mostly transcriptionally silent[6]. Instead, support cells called nurse  
51 cells synthesize RNA, proteins, and organelles which are transported into the oocyte[7]. These  
52 maternally produced mRNAs are responsible for many of the critical events of early embryogenesis, such  
53 as the rapid cleavage cycles, the establishment of body axis, and the coordination of the handoff of  
54 control to the zygotic genome. This handoff of developmental control from mother to zygote, known as  
55 the maternal to zygotic transition (MZT), is complex from a regulatory standpoint. Critical housekeeping  
56 genes retain a steady transcript level, despite changing the genome of origin. New transcripts must be  
57 synthesized from the newly activated zygotic genome, and maternal transcripts must be degraded, in a  
58 highly regulated and time-specific manner[8]. This transition is well studied in model systems such as  
59 *Drosophila melanogaster*, where maternal mRNA degradation regulators such as *smaug* (*smg*)[8] and  
60 regulators critical to the activation of the zygotic genome such as *zelda* (*zld*)[9,10] have been identified.  
61 When the transition of developmental control between the two genomes is complete, the zygotic  
62 genome must be poised to carry out the rest of development in a precise manner. One process that  
63 exemplifies the precision required at the handoff to the zygotic genome is segmentation in *Drosophila*.  
64 This process begins with broad maternal gradients which control transcription of early zygotic gap  
65 genes, and later pair-rule genes, at precise locations within the embryo at specific developmental  
66 times[11,12].

67 Regulation of transcripts in development has been the subject of considerable study in *D.melanogaster*.  
68 Much of this study has been focused around the process of the MZT or other important events in early

69 development, such as patterning along the anterior-posterior or dorsal-ventral axes. For example, a  
70 number of regulators of maternal transcript degradation at or prior to the MZT have been identified[13–  
71 16]. Zygotic transcription activation has also been the subject of considerable study, and has implicated  
72 critical transcription factors such as *zelda* and *grainy head*[4]. How transcripts are transported into eggs  
73 has been the subject of some study[7,17,18], as has how those maternal transcripts are regulated post-  
74 transcriptionally[3,19–23]. Post-transcriptional mRNA regulation is especially crucial at the maternal  
75 stage as new transcripts cannot be produced after the completion of oogenesis. However, how  
76 transcript production is regulated in the nurse cells is largely unknown. As transcript pools at both the  
77 maternal and zygotic stages are highly conserved over evolutionary time[24], we employed a  
78 comparative approach to investigate gene regulation at these stages.

79 In this study, we uncover regulatory elements that are associated with transcription in the early  
80 *Drosophila* embryo, from both maternally deposited and zygotically transcribed genes. We use motif  
81 analysis to compare regulation of maternal versus zygotic transcription, and also investigate how  
82 regulation at these two stages is different across *Drosophila* species. To this end, we used a previously  
83 generated RNAseq dataset from Atallah and Lott, 2018, which sampled embryos from a developmental  
84 stage where all transcripts are maternal (stage 2[25,26]) and a stage after zygotic genome activation  
85 (end of stage 5 [23,24]), across 14 species, representing ~50 million years of divergence time. Here, we  
86 used the transcript abundance data from 11 of these species (due to limitations in genome annotation  
87 quality, see Methods), representing the same span in divergence time, to examine putative regulatory  
88 regions of maternally deposited or zygotically transcribed genes. Through comparisons of these  
89 sequences and associated gene transcription levels, we identified a number of sequence motifs as being  
90 enriched in either maternally deposited or early zygotically expressed genes. We found a high similarity  
91 between motifs across all species, suggesting a high level of conservation for regulation of transcription  
92 within each genome (maternal and zygotic). At the stage controlled by maternal transcripts, we found a

93 high number of motifs that bind to proteins annotated with insulator function or that have previously  
94 been associated with boundaries between topologically associating domains (TADs). Our findings  
95 suggest that maternal transcription is largely controlled through regulation of chromatin state, and not  
96 through gene-specific mechanisms. Many transcription factors predicted to bind the identified motifs  
97 were found to be enriched in ovaries[27]. After zygotic genome activation (stage 5), we find many of the  
98 motifs known to be associated with early zygotic transcription, such as the binding site for the pioneer  
99 transcription factor, Zelda, reinforcing many previously identified aspects of transcriptional regulation at  
100 this stage. We also find a larger number of motifs with less significant enrichment at this stage, with  
101 evidence that points to these motifs regulating a smaller subset of genes. This study provides evidence  
102 for global control of maternal transcription at the level of chromatin, while zygotic transcription is  
103 regulated in a more gene-specific manner. This is especially striking considering that the maternal  
104 transcript pool is more highly conserved than that of the early zygote[24].

## 105 Results

### 106 **Discovered maternal-associated motifs are bind architectural proteins; discovered** 107 **zygotic-associated motifs bind to known zygotic regulators**

108 To examine the regulatory basis of maternal and zygotic transcription, we surveyed the genomes of 11  
109 *Drosophila* species for regulatory elements. These species represent the evolutionary divergence of the  
110 *Drosophila* genus, encompassing divergence times from 250,000 to 50 million years[28]. The RNAseq  
111 datasets produced from Atallah and Lott (2018)[24] were used. These data sampled two developmental  
112 stages, one where all transcripts present are maternally derived (stage 2, Bownes' stages[25,26]) and  
113 the other after zygotic genome activation (the end of stage 5, or the end of blastoderm stage). The  
114 transcript abundance data was used to classify each gene as being on or off at both stage 2 and stage 5

115 for each species (see Methods). For each gene, we extracted sequences at likely locations for proximal  
116 regulatory elements (see Methods). To accommodate the varying annotation quality of the various  
117 species, this search encompassed introns, exons, and a 2kb region upstream of the gene.

118 To identify motifs associated with maternally deposited genes, we employed HOMER[29]. For most  
119 species, a characteristic pattern emerged where the most enriched motifs were present in the upstream  
120 region of the maternally deposited genes, with less enriched motifs appearing in exons (Fig S1). Some  
121 motifs, possibly representing repressor binding sites, were enriched in the upstream and intron region  
122 of genes that were not maternally deposited as compared to the genes that were maternally deposited  
123 (Fig S1).

124 Analyzing regulatory elements at the post-zygotic genome activation stage (stage 5) presents a  
125 challenge, as it is difficult to distinguish newly transcribed zygotic mRNAs from residual maternally  
126 deposited mRNAs. At this stage, roughly half of the transcripts present are maternal transcripts that  
127 have not yet been degraded[8,30–32]. Therefore, to interrogate regulatory elements associated with  
128 zygotic transcription, we restricted our search to genes that do not have transcripts present at stage 2  
129 but do have transcripts present by stage 5. Because of these stricter requirements for zygotically  
130 transcribed genes, there were far fewer genes in the dataset (66,206 genes in the stage 2 dataset  
131 combined from all species, compared to 10,215 total genes in the stage 5 dataset for all species),  
132 resulting in a reduction in statistical power. However, without these assumptions, we risk failing to  
133 identify signals associated specifically with zygotic transcription amongst the signal of maternal  
134 transcription.

135 To determine which proteins are likely to bind to maternal or zygotic motifs, we used Tomtom[33] to  
136 evaluate the similarity of the discovered motifs to several motif databases (Table 1) for *D.*  
137 *melanogaster*. The motifs found in maternally deposited transcripts are similar to those discovered

138 previously in two different contexts: those associated with topologically associated domains (TADs)[34],  
139 and those associated with housekeeping promoters[35,36]. This is consistent with existing data showing  
140 that functions of maternally deposited genes are enriched for genes with housekeeping  
141 activities[36,37]. In order to determine whether the motifs associated with maternal transcripts in our  
142 data were simply due to the inclusion of promoter elements from housekeeping genes, we measured  
143 the enrichment of these motifs in maternally deposited genes that are not housekeeping genes (see  
144 Methods). We found that our motifs are strongly enriched ( $p < 1e-34$ ) in maternally deposited genes  
145 even when excluding housekeeping genes (S6 Figure A). This indicates that these motifs are having a  
146 strong effect outside that of those contained in housekeeping genes during this stage. Thus, we  
147 hypothesize that the regulatory mechanisms responsible for generating TADs[34] are also responsible  
148 for maternal transcripts, and that maternal transcription may be regulated by the establishment of  
149 TADs. TADs are genomic regions where the chromatin on one side of the boundary interacts  
150 substantially less than expected with the chromatin on the other side, and interactions of DNA elements  
151 within the domains can be promoted. While TADs are generally thought to be associated with  
152 transcription [34], there is some controversy as to the nature and magnitude of the effect of TADs on  
153 gene expression [38], as disruption of TADs has not been found to be sufficient to alter transcription in  
154 some cases.

155 The motifs associated with maternally deposited genes are predicted to bind several insulators or  
156 architectural proteins. An insulator is a regulatory element that suppresses the interactions of other  
157 regulatory elements with genes, or prevents the spread of chromatin state. An architectural protein is a  
158 protein that organizes and regulates chromatin structure. The most prominent motif by q-value binds to  
159 DNA replication-related element factor (DREF), a known architectural protein and the “master key-like  
160 factor for cell proliferation”[39]. It is required for normal progression through the cell cycle. It is known  
161 to occur in the promoters of many cell proliferation genes and to interact with chromatin remodeling



162 proteins. Interestingly, DREF binding site overlaps with the binding site for BEAF-32, another well-  
163 researched protein that acts as an insulator[40,41] that often appears between head-to-head genes  
164 (genes with adjacent promoters that get transcribed in opposite directions). Another identified motif is  
165 predicted to bind ZIPC, which is known to bind and recruit CP190, an insulator. A previous study  
166 provides evidence for the co-localization of ZIPC and BEAF-32[42], which likely work together with  
167 CP190 to perform insulator functions. Thus of the most enriched motifs in maternal genes (DREF, BEAF-  
168 32, ZIPC), many have previously identified roles as insulators or in other ways regulating chromatin  
169 state.

170 Another maternal motif identified is predicted to bind M1BP (motif-1 binding protein), which causes  
171 RNA polymerase II (Pol II) to pause on the gene[43]. Pol II pausing is critical to early zygotic  
172 expression[36,44] but its function in producing the maternal transcriptome is unknown. Several  
173 functions have been suggested for this Pol II pausing behavior, including maximizing transcription speed  
174 once certain conditions are met, synchronizing with RNA processing machinery, reacting to other  
175 developmental or environmental signals, keeping chromatin accessible, and acting as an insulator. Given  
176 that M1BP is both maternally deposited at high levels and has increased expression in the early embryo,  
177 it is possible that M1BP has multiple functions at different time points. During oogenesis, pausing to  
178 wait for external signals or RNA processing machinery seems counterproductive to maximizing  
179 transcription in the ovary, but the other function of maintaining a state of open chromatin and  
180 solidifying TAD boundaries may be very important. In contrast, at stage 5 it may be much more  
181 important to maximize expression in response to certain signals.

182 In searching for motifs associated with zygotic expression, we recovered motifs for well-known  
183 regulators of the zygotic genome (Table 1). We only identified a small number of highly enriched motifs  
184 at this stage, and thus were able to predict a much smaller number of predicted factors binding to these

185 motifs, including Trl (or GAGA factor) and Zelda. Trl is a known early zygotic activator and chromatin  
186 remodeler[45–47] and Zelda is known as a “master key regulator” to early developmental genes[9,48]  
187 and appears to be a pioneer transcription factor that establishes the initial chromatin landscape of the  
188 zygotic genome[5] . In addition to these high-quality motifs, we found a large number of motifs with  
189 lower quality scores (Table S1). These motifs may regulate spatio-temporal specific genes that we  
190 observe in the early embryo, and thus have a lower enrichment score due to our whole-embryo  
191 approach being ill-equipped to finding such specific patterns.

## 192 **Similar motifs appear in different species**

193 To quantify the conservation of the discovered motifs across the 11 species in our study, we used  
194 Tomtom[33] to measure the similarity between the sets of motifs discovered in different species. For a  
195 motif to be considered conserved between two species, we required that it be discovered by HOMER in  
196 both species and for Tomtom to report a statistically significant alignment score (see Methods). At the  
197 maternal stage, we found that high quality ( $q$ -value  $< 1e-100$  by HOMER, see Methods) motifs tended to  
198 be well-conserved (Fig 1A) with a large percentage of the total discovered motif content shared across  
199 species. We observed that sister species *D. pseudoobscura* and *D. persimilis* are unique in that they have  
200 the highest number of motifs that are either species-specific or are only shared with each other, and  
201 have the fewest number of motifs shared with the rest of the species. This is especially noteworthy  
202 considering that this lineage is roughly in the middle of the distribution of divergence times from most  
203 of the other species, and thus many more distantly related species comparisons have a higher degree of  
204 motif conservation than do any comparisons with these two species. This is consistent with previous  
205 results[24] that this lineage has a disproportionately high number of changes in transcript abundance for  
206 its phylogenetic position, and suggests that these large number of changes in transcript abundance may  
207 be due to the large scale changes in regulation in these species observed here . When comparing the

208 rest of the species, we found a relatively higher number of conserved motifs shared between pairs of  
209 species within the *Drosophila melanogaster* species group (*D. melanogaster*, *D. simulans*, *D. sechellia*, *D.*  
210 *yakuba*, *D. erecta*, *D. ananassae*), and a slightly reduced number of conserved motifs between the *D.*  
211 *melanogaster* group species and the more distantly related species (*D. willistoni*, *D. mojavensis*, *D. virilis*)  
212 (Fig 1B). At stage 5, we do not observe a high percentage of conserved motifs between species, rather  
213 we observe many motifs that are significantly enriched in just one or two species. We also observe little  
214 phylogenetic signal in the data, with the only detectable pattern being that the species with the longest  
215 divergence time from the rest of the species, *D. virilis* and *D. mojavensis*, have slightly fewer shared  
216 motifs (Fig 1 C,D). If the unique motifs at either stage indeed represent newly evolved regulatory  
217 mechanisms, we expect that these motifs to be rare or to have a smaller frequency difference between  
218 transcribed and non-transcribed genes. Either of these effects would raise the false discovery rate as  
219 reported by HOMER, which makes the number of species-specific zygotic motifs identified all the more  
220 remarkable. Additionally, more highly conserved motifs should require less power to be discovered as  
221 they are by definition present across more species, and thus we should have more power to identify  
222 them than less-conserved motifs. It is still possible that there are more conserved motifs at the zygotic  
223 stage that we do not observe due to the lower number of genes used at this stage. Despite this,  
224 however, the dominant signal we find from the motifs we have power to detect is non-conserved. This  
225 is underscored by the observation that when we reduce our quality threshold for motifs at stage 5, we  
226 still do not observe motifs to generally be conserved across species (Fig S4 B).

## 227 **Motif conservation by gene**

228 While these results show that some motifs are important to regulation in the genomes of multiple  
229 species, do not speak to whether orthologous genes in different species tend to contain similar motifs.  
230 To investigate whether regulation was conserved at the level of individual genes, we compared the

231 motif content of each *D. melanogaster* gene (see Methods) to the motif content of each of its orthologs  
232 from other species. We counted motifs as conserved between two species if the motif appeared in both  
233 orthologs. For both stage 2 and stage 5, we categorized motifs based on the percent of orthologs for  
234 which the motif was conserved (Fig 1E). Motifs have different levels of gene-specific conservation  
235 between stages, with maternal stage motifs appearing to have lower conservation across orthologues  
236 than zygotic stage motifs, where a larger proportion of orthologues possess the same motif. This is  
237 striking, as this seems to imply that while gene expression and regulation are both highly conserved for  
238 maternal genes, which genes are regulated by a particular regulator is not. It is possible that the genes  
239 that are missing motifs compared to their orthologues are regulated by different motifs, or that the  
240 same motifs that are in radically different positions in different species. As many different maternal  
241 motifs appear to be regulating transcription at the level of chromatin state, these motifs may be able to  
242 function interchangeably. Thus this environment may be more conducive to more motif turnover at this  
243 stage but with higher conservation of transcription overall[24], as compared to the zygotic stage.

## 244 **Motif position**

245 While similar binding motifs identified in multiple species implies that regulatory proteins with similar  
246 binding domains are acting in these species, we can also verify the similarity in the regulatory machinery  
247 by the relative positions of the binding sites relative to the genes they are regulating. To investigate  
248 whether the discovered motifs had the same positional relationship with the transcription start site  
249 (TSS) across all species, we generated position frequency data for each motif. For each gene, we  
250 examined each position starting from 2kb upstream of the TSS to the 3' end of the gene body, and  
251 whether there was a motif at that position. Many of the most prominent motifs shared a similar  
252 distribution pattern, characterized by a strong peak at -100bp, and sometimes a secondary peak at -  
253 340bp (Fig S2). To quantify this similarity, we performed an Anderson-Darling test on each motif for

254 each pair of species, which indicated that 65% (stage 2) and 91% (stage 5) of motif distributions are  
255 identical between species (percent of motifs for which  $p < .05$ ). This suggests conservation of the  
256 relationship between binding to these motifs and initiation of transcription. The higher conservation of  
257 motif position in stage 5, which has fewer conserved motifs between species than stage 2, may be  
258 consistent with this stage having more gene-specific regulation, as discussed further below.

## 259 **Motif Strandedness**

260 While some studies focus on finding motifs with a particular orientation relative to their proximal  
261 genes[49], there is some evidence that motifs do not behave in a strand-specific manner[50]. To  
262 evaluate the importance of the strandedness of the discovered motifs, we generated a regression to  
263 predict expression level that differentiated between forward and reverse versions of each motif (see  
264 Methods). This regression indicated a significant difference between the forward and reverse versions of  
265 many motifs. For example, we found the E-box motif affects the log-odds of maternal deposition by .192  
266 in the forward orientation but only .115 in the reverse orientation (t-test,  $p < .001$ ). For almost all  
267 motifs, different strands had the same qualitative effect on expression, but with different magnitudes,  
268 indicating that while motifs had the same effect regardless of orientation, their efficiency could be  
269 increased if the orientation was optimal.

270 While the strandedness of motifs may play a small role in their overall effect, we want to know if  
271 strandedness makes a qualitative difference to our motifs effects on transcript level, and if we can use  
272 motif strand to improve our model. To determine this, we ran HOMER exclusively on the same strand  
273 that the gene appeared on, rather than the default mode of scanning both strands. This resulted in the  
274 same set of motifs being discovered. This is consistent with the regression results that show that each  
275 motif, whether located on the positive strand or the negative strand relative to the transcription start  
276 site, has the same qualitative effect on gene expression, indicating that the direction of each motif had

277 minimal effect on expression. To evaluate whether the strand the motif was located on relative to the  
278 gene was predictive in whether a gene was transcribed at a particular stage , we constructed another  
279 regression using only the data from the same-strand motifs. This regression performed less well than  
280 the regression using motifs from both strands (AIC = 7915.8 for the unstranded regression, AIC = 8612.5  
281 for the stranded regression for a representative species *D. ananassae*). Overall, this suggests that motif  
282 binding elements need not bind in a strand specific manner to induce their effects, though the optimal  
283 orientation provides measurable increase in their effect on transcription. This result is the same at both  
284 stage 2 and stage 5.

## 285 **GO analysis**

286 While we have identified a set of motifs that together seem to be responsible for early embryonic  
287 RNA content, we next asked if these motifs are likely to be regulating genes with specific types of  
288 functions. To this end, we performed gene ontology (GO) analysis on groups of genes, based on their  
289 motif content. To simplify this analysis, we chose to focus on the top 8 motifs as reported by HOMER,  
290 and for each of the 8 motifs, we performed GO analysis on the transcript pools at each stage as well as  
291 on each motif individually[51,52]. We initially performed a GO analysis on both the maternally deposited  
292 and zygotically transcribed transcript pools, disregarding motif content. When comparing stages, we  
293 observe no overlap between GO terms (Fig 2A), which is consistent with our expectations that the genes  
294 that are activated in the zygote have different functionality to those transcripts that are maternally  
295 deposited, especially as our definition of zygotically transcribed genes excludes genes present in stage 2.  
296 When examining genes containing specific motifs within each stage, we observe that many of the stage  
297 2 motifs show a similar pattern in the GO categories they are associated with, with the strongest  
298 associations belonging to the DREF motif, which is strongly associated with most identified categories  
299 (Fig 2B). This could be an indication that there is a high degree of homogeneity in terms of the types of

300 genes these motifs may regulate. In contrast, the stage 5 motifs present in zygotic-only genes show  
301 more variety in the GO terms of genes they are associated with (Fig 2C), which could be indicative of  
302 more specific regulation for these genes at this stage.

303 While the previous GO analysis indicated that the top motifs at stage 2 display significant overlap in  
304 associated GO categories, this does not exclude the possibility that specific GO categories are regulated  
305 by specific motifs. To search for more specific motifs, we performed motif analysis using HOMER to find  
306 overrepresented sequences in the top GO terms within maternally deposited genes, resulting in several  
307 motifs which are enriched in specific GO terms (Fig. S5), though very few of them are significantly  
308 enriched after multiple test correction. These motifs do not appear in other analyses, and do not have  
309 strong matches to proteins expressed in the ovary found in the literature. Because these motifs are  
310 associated with a small subset of genes, we hypothesized that these motifs confer specificity to  
311 transcription of specific genes with accessible chromatin. To determine whether these motifs are  
312 associated with increased expression at stage 2, we used linear models to measure the effect of the  
313 presence of these motifs, specifically in genes that already contain motifs that bind to architectural  
314 proteins, or whose adjacent genes are highly expressed. We did not find that the presence of these GO  
315 term-specific motifs increased the odds of maternal deposition (Fig S5). It is possible that this result is  
316 due to the lack of statistical power surrounding these motifs, as these motifs are somewhat rare. This  
317 result could also be the underlying biology, however, and these motifs could be non-functional at stage  
318 2.

### 319 **Predicted maternal motif binding proteins are enriched in the ovary**

320 Next, we investigated whether the potential motif binding proteins we identified were plausible  
321 regulators of maternal deposition. It is unclear whether the motifs we identified as enriched in  
322 maternally deposited genes are associated specifically with maternal deposition, given that chromatin

323 regulators are important at all stages in all tissues. To investigate, we used modENCODE[53] transcript  
324 abundance data to compare the mRNA transcript levels for proteins predicted to bind our discovered  
325 motifs, and found increased expression in ovaries (Fig 3A) as compared to other tissues sampled. This  
326 pattern exists, though to a lesser extent, in the FlyAtlas 2 dataset[54], which is a tissue-specific database  
327 of transcript levels that utilizes RNA-seq data rather than microarray analysis. The discrepancy between  
328 the two datasets could be due to the differences in gene expression measurement method or in  
329 experimental methods. The transcripts for these proteins also show moderately high abundance in our  
330 own dataset (File S5). While it has been demonstrated that mRNA levels do not necessarily mirror  
331 protein levels[55], the enrichment of mRNA in ovaries compared to other tissues is reasonable evidence  
332 that these proteins are important in ovaries.

333 To investigate whether these proteins are acting to affect transcription in the ovaries specifically, we  
334 examined the expression profiles of RNA in various tissue types (referenced in Fig 3B) from existing RNA  
335 quantification datasets[53,56]. For each instance of a motif of interest, we extracted the transcript level  
336 from within a 20kb window surrounding the motif and measured the normalized relative transcript level  
337 for each position (an example of this is shown in Fig 3B). While the relative normalized transcript level  
338 changes in each of the measured tissues, the effect is strongest in ovaries, indicating that the presence  
339 of one of these binding sites is associated with a higher increase in transcript levels in the ovary  
340 compared to other tissues.

341 As the motifs associated with maternal transcription also act to some degree in other tissues, we next  
342 wanted to ask whether the motifs were more enriched in maternally deposited genes than in genes  
343 expressed in other tissues. To determine whether regulation in different tissue types were associated  
344 with different motifs, we ran HOMER in the same manner as with the maternal stage data to discover  
345 enriched motifs (see Methods) in transcripts present in other tissues, as identified from ModENCODE  
346 data[57]. We found that most other tissue types were also enriched in the same motifs discovered in



347 transcripts present in stage 2 embryos. However, examining the frequency of motifs in specific genes  
348 revealed that the majority of those motifs were from genes that were shared between those tissue  
349 types and stage 2 embryos. When we exclude genes that are expressed in stage 2 embryos, HOMER fails  
350 to identify the original set of motifs as enriched in male larval gonads, male reproductive tract, adult  
351 heads and adult midgut. Furthermore, HOMER detects the motifs at a lesser rate in larval ovaries, larval  
352 CNS, and intestinal tract. Despite being identified in fewer tissue types and at a lesser rate in other  
353 tissue types as compared to the stage 2 expression levels, the observation that these motifs may also  
354 have important functions in other tissue types is consistent with the literature. For example, DREF is  
355 known to be important for cell proliferation and chromatin regulation, and is active in many other  
356 tissues[58,59]. These motifs are likely associated with many housekeeping genes that are vital to a  
357 variety of tissue types.

### 358 **Maternally deposited genes are physically clustered on the genome**

359 In addition to motifs, we observed several other effects that were related to early embryonic RNA  
360 content. Given that many of our discovered motifs bind architectural proteins, we hypothesize many  
361 effects may be linked to the physical location of genes on the chromosome. We examined the positional  
362 distribution of transcribed genes in various tissue types (Fig 4A). As previous papers utilizing the Hi-C  
363 method have shown correlation with active topologically associated domains (TADs) and gene  
364 expression[60,61], we predicted that any tissue type where regulation is dominated by architectural  
365 proteins to transcribe a set of genes physically clustered on the chromosome. To compare the physical  
366 gene clustering of transcription at the maternal stage with that of other tissue types, we acquired  
367 several RNAseq datasets from NCBI/GEO[62] and performed a Wald–Wolfowitz runs test[63] on each  
368 tissue of the previously described tissue types. While all tissues examined showed a strong preference  
369 for groupings of transcribed genes, embryonic stage 2 samples were the most highly grouped (Fig 4B).

370 This result was robust to changes in the threshold of what is considered to be expressed (see Methods).

371 This pattern of physical co-expressed gene clustering on the chromosome is consistent with our model  
372 of regulation via architectural proteins.

373 While these results speak to the pattern of clustering of expression for maternal genes in terms of  
374 adjacent genes being on or off, they do not account for the distance between genes. To answer the  
375 question of whether this clustering phenomenon is dependent on distance, we examined the distance to  
376 adjacent genes. We observed a trend whereby proximity to an active promoter increases the odds of  
377 maternal deposition (Fig 4C). This effect was slightly affected by the strandedness of the two genes  
378 whereby genes that have an opposite orientation are more likely to have different expression. This is  
379 consistent with observations from previous studies[34] that consecutive genes on the same strand were  
380 more likely to show co-expression, while consecutive genes on opposite strands were more likely to  
381 have different expression.

382 Many previous studies have observed that zygotic genes tend to be short in length[24,30,64,65]. In  
383 addition to affecting transcription speed, shorter gene lengths result in a smaller distance between  
384 transcriptional units along the chromosome, especially when considering which strand the gene is on. To  
385 explore gene length in maternal genes and the relationship between gene length and the position on  
386 the chromosome, we measured the maternal deposition rates with respect to gene length. We observed  
387 a trend that in most species, shorter genes are less likely to be maternally deposited. There are  
388 differences in the length of maternal genes across species, and this trend could be partly due to the bias  
389 for more highly annotated genomes to be enriched in shorter genes (Fig 4D). Additionally, chromatin  
390 context seems to heavily influence this effect: when the adjacent genes are off, gene length is much  
391 more important (Fig 4C) and very short genes are very likely to be off. This could be because shorter  
392 genes are more likely to be influenced by the regulatory machinery of a nearby gene. Alternatively,

393 longer genes might be long enough to physically isolate themselves more effectively and establish their  
394 own unique regulatory environment.

395 Given that a number of motifs found in this study are bound by proteins annotated as insulators, and  
396 the motifs are similar to those that are associated with TADs, we asked where the motifs found in our  
397 dataset can be found relative to TAD boundaries. Previous results suggest that architectural proteins are  
398 prevalent in the centers of TADs as well as the boundaries[34], and may be involved in mediating  
399 interactions of the DNA within a TAD [38]. To determine the location of motifs in the context of TADs, we  
400 assessed the transcription of nearby genes relative to the transcription of a gene with these identified  
401 motifs. For each regulatory region, the gene nearest to that regulatory region was examined, as well as  
402 two genes downstream and two upstream. The frequency of motifs was measured based on the  
403 transcript abundance pattern of these five genes. Many of the top motifs including Dref, M1BP, Zipic,  
404 and E-box, occur more frequently in the center of maternally deposited gene clusters, rather than on the  
405 edge of clusters. (t-test p-values  $7e-3$ ,  $2e-6$ ,  $3e-10$ , and  $1e-4$  respectively). This is consistent with previous  
406 results[34], and may suggest an important role for architectural proteins in promoting interactions  
407 within a TAD as well as potentially in establishing TAD boundaries.

#### 408 **Stage-specific genes are isolated on the genome**

409 Given that maternally deposited genes are physically clustered together in the genome, we wanted to  
410 examine if this pattern held with the set of genes that were stage-specific. To determine if consecutively  
411 expressed cluster size is related to stage-specificity of transcript representation, we examined maternal-  
412 only (transcripts present at stage 2 and entirely degraded by stage 5) and zygotic-only genes (transcripts  
413 present at stage 5, not present at stage 2; for both stage-specific categories, see Methods for further  
414 definitions) and their frequencies in clusters of different sizes. We determined that for most species, in  
415 contrast to all maternally deposited genes, both maternal-only and zygotic-only genes are more likely to

416 be in smaller (1-3 consecutive active genes) groups than in larger groups (more than 3 consecutive  
417 active genes) (Fig 5, A and B). For these stage-specific genes, this could be an indication that control of  
418 stage-restricted genes is more specific, affecting single genes rather than larger clusters. Results for  
419 most other analyses of maternal-only genes were unable to be obtained due to the very low number of  
420 genes in this category (see Methods).

### 421 **GC-content of upstream regions is predictive of maternal deposition**

422 In *Drosophila*, transcription start sites are frequently associated with a spike in GC content. These spikes  
423 in GC content have been suggested to act as “genomic punctuation marks” to delineate functional  
424 regions, though their mechanisms of action are not clear[66]. To explore this phenomenon with respect  
425 to the two developmental stages we examined, we evaluated the average GC content of upstream  
426 regions for genes in stage 2 and stage 5. When comparing the GC-content of putative cis-regulatory  
427 sequences in maternally versus non-maternally deposited genes, we observed an increase in GC-content  
428 upstream of the TSS (Fig S3), as well as a dip in GC content ~200bp upstream of these genes. In contrast,  
429 this modulation does not occur in genes that are off at both stage 2 and stage 5, nor in genes that are  
430 off at stage 2 but activated at stage 5. To determine whether this modulation of GC-content was  
431 predictive of maternal deposition, we constructed four generalized linear models using the GC-content,  
432 the motif data, and both the motif data and GC-content as data sources (see Methods). Adding the GC-  
433 content to the model that already included motif data improved the model (AIC: 185589 without GC  
434 content AIC:183079 with GC content), hence increased GC content upstream of TSS is somewhat  
435 predictive of maternal deposition, even when accounting for motif presence in this region.

436 The biological significance of this spike in GC content is unclear. Fluctuations in GC content have been  
437 observed in *Drosophila* previously [66], and there is evidence in humans that spikes in GC content are  
438 associated with supercoiling [67]. DNA supercoils are generated in via transcription, and positive

439 supercoils are observed to inhibit transcription [68]. In *Drosophila* negative supercoils have been  
440 associated with high transcriptional activity in polytene salivary gland cells [69], and GC content directly  
441 impacts the biochemistry of DNA with respect to torsional stress [70]. As the nurse cells where maternal  
442 transcripts are produced are polyploid with a high transcription rate, nurse cell chromosomes may be  
443 under similar torsional stress. This may explain why maternally deposited genes in particular are  
444 associated with this spike in GC content.

445

446

## 447 Discussion

448 Maternally deposited gene products are responsible for the first stages of embryonic development in all  
449 animals[71]. It is therefore critical that the required kind and amount of mRNAs and proteins are  
450 deposited into the unfertilized egg. Later in development, the zygotic genome becomes transcriptionally  
451 active and takes over control of development from maternal mRNAs. Failure in maternal mRNA  
452 deposition, zygotic genome activation, or the transfer of developmental control between the two  
453 genomes can lead to lethality[1,9,13], thus the gene products regulating early development are critical  
454 to organismal survival.

455 Previous research has shown that the maternal and zygotic mRNA expression profiles of different  
456 species of *Drosophila* are generally conserved, but with some noticeable differences[24]. To investigate  
457 the regulatory basis of transcription at these stages, we leveraged a large comparative dataset to  
458 identify the transcription factor binding motifs found in the *cis*-regulatory sequences of these genes. We  
459 found that the regulatory basis of both the maternal and zygotic-only transcripts also had significant  
460 conservation, which permitted the discovery of common features of gene regulation across *Drosophila*.  
461 Specifically, we identified transcription factor binding motifs that are associated with mRNA expression

462 across species for maternally deposited transcripts and zygotically expressed transcripts. We also  
463 investigated the effects of other regulatory mechanisms such as chromatin state on maternal and  
464 zygotic expression of mRNAs, as well as the association of transcript levels at these two stages of  
465 embryogenesis with gene length, strandedness, and GC content.

466 Generally, we found a number of conserved transcription factor binding motifs associated with  
467 transcript abundance for both the maternal and zygotic-only transcripts. At the maternal stage, there  
468 were a larger number of more highly conserved motifs than were found for the zygotic-only genes. This  
469 is consistent with a previous study that found that maternal transcripts themselves were more highly  
470 conserved than transcripts at the zygotic stage [24]. Given this, surprisingly we also found less  
471 conservation of particular motifs at conserved genes transcribed at the maternal stage. As we found a  
472 number of motifs involved in regulation at the level of chromatin at the maternal stage, perhaps  
473 different combinations of chromatin regulating motifs can be utilized interchangeably without altering  
474 expression status. This could provide robustness, permitting evolutionary changes in sequence without  
475 affecting gene expression of maternal genes. In contrast, while we find that the zygotic-only transcripts  
476 are associated with fewer conserved motifs overall, and more divergent lineage and species-specific  
477 motifs, that individual conserved genes are more likely to be regulated with the same motifs. This  
478 provides conservation of gene expression by a different mechanism for the zygotic-only genes that are  
479 functionally required across *Drosophila*. Why the two stages and genomes would have such different  
480 ways of activating conserved genes across the genus is likely due to the underlying biology of regulation  
481 at the two stages, as discussed in detail below.

482

## 483 **Maternal Regulation**

484 We found that motifs associated with putative *cis*-regulatory regions of maternally deposited genes are  
485 predominantly annotated as insulator binding sites. An insulator is a type of regulatory element that can  
486 block the interactions of *cis*-regulatory elements with promoters or prevent the spread of chromatin  
487 state. Insulators are known to be important in creating and maintaining the gene expression patterns,  
488 ubiquitous in *Drosophila*, and potentially a key factor for *Drosophila* to maintain such a high gene  
489 density[42]. Here, we find that the process of maternal deposition may rely heavily on insulators to  
490 express a large percentage of the genome. Because the roles and mechanisms of factors annotated as  
491 insulators are not well understood, using the term “Architectural Protein” instead of insulator binding  
492 protein may be more appropriate[72]. Recently, these proteins have been studied using genome-wide  
493 chromatin organization methods, such as Hi-C, which detects regions of interacting chromatin known as  
494 Topologically Associated Domains (TADs) and identifies boundaries between them. Histone marks  
495 appear to be enriched in certain TADs but stop abruptly at TAD boundaries, supporting the idea that  
496 certain TADs are entirely transcriptionally silenced while others are expressed[34]. Furthermore, ChIP-  
497 seq has demonstrated that TAD boundaries in other tissues are enriched in architectural protein binding  
498 sites[34] , including several those that we identified in this study.

499 There is some disagreement on the effect that TADs have on gene expression, however. Ghavi-helm et  
500 al [73] demonstrate that the disruption of TADs does not necessarily disrupt the constituent gene  
501 expression. Instead, they suggest TAD boundaries acting to prevent interactions between TADs is rare or  
502 tissue specific. Others suggest that it is possible that TADs are increasing robustness to other regulatory  
503 mechanisms[74]. Because TAD-associated elements appear to be associated with maternal deposition  
504 in our dataset, we hypothesize that these elements are regulating maternal deposition via chromatin-  
505 level control. It is possible that there are other additional mechanisms that we do not detect.

506 To understand the connection between architectural proteins and maternal deposition, we need to  
507 examine where these transcripts are produced to understand the cellular context. In the ovary, nurse

508 cells are responsible for the transcription of maternally deposited genes, and there is a considerable  
509 body of literature devoted to nurse cell biology. Much study has been directed towards elucidating how  
510 nurse cells transport their products into the oocyte and how post translational control mechanisms fine-  
511 tune protein levels of maternal transcripts[3,7,18–23,75]. However, despite this wealth of knowledge,  
512 the regulatory mechanisms by which the nurse cells specify which genes to transcribe are largely  
513 unknown. One unusual feature of nurse cells is that they are highly polyploid[76,77]. One of the major  
514 benefits of this could be an across-the-board increase in transcription rates necessary to provision the  
515 embryo with all necessary transcripts. These transcripts represent a large proportion of the genome,  
516 with estimates ranging from 50-75%, depending on experimental conditions[3], and necessitate large  
517 amount of transcription overall in a short period of time. We extract >100ng total RNA from an embryo;  
518 this is an astonishingly large amount of RNA to be present in what is essentially at the time of  
519 fertilization a single, albeit a highly specialized, cell. One point of comparison is Abruzzi et al. 2015,[78]  
520 who extracted 2-5pg RNA per *Drosophila* neuron. A transcriptional environment that is optimized to  
521 quickly transcribe huge numbers of genes might be more amenable to control via chromatin state.

522 Given the amount of overlap between the motifs enriched in the *cis*-regulatory regions of maternally  
523 deposited genes and the motifs associated with TAD boundaries, it is possible that these same  
524 architectural proteins are functioning to define which genes are maternally transcribed and then  
525 deposited into the embryo. We found that the maternally deposited genes are highly clustered on the  
526 genome, which is indicative of control via architectural proteins. Additionally, we uncovered that  
527 proximity to nearby expressed genes is highly correlated with expression. We also identified a pattern  
528 whereby the relative strandedness of adjacent genes is indicative of whether they will be maternally  
529 deposited, which is a pattern that has been previously observed with insulators[34]. Each of these  
530 results is consistent with known behavior of architectural proteins, suggesting that expression at stage 2  
531 is controlled locally on the chromosome by activating TADs rather than specific genes.



532 As architectural proteins are important in determining genome organization and regulating transcription  
533 to some degree in all tissues and stages, we investigated whether the regulatory patterns we observed  
534 for maternal genes were ovary-specific or shared across all stages and tissues. Many of the motif binding  
535 elements discovered in this analysis appear to be enriched in ovaries, although these proteins have  
536 important functions in other tissues as well. Some of the proteins predicted to bind our motifs have  
537 been noted for being enriched in the regulation of housekeeping genes, and as maternally deposited  
538 genes themselves are enriched in housekeeping genes, this result is perhaps unsurprising. A number of  
539 studies have suggested that in addition to the common architectural proteins shared across conditions  
540 and developmental stages, there may exist tissue-specific architectural proteins that integrate into the  
541 canonical protein complex to produce tissue-specific TAD patterns[79–81]. Perhaps this is the case with  
542 the ovary, and further study will reveal whether there are ovary-specific factors that may interact with  
543 the common architectural proteins whose binding sites we find enriched here. For example, the authors  
544 of Matatz et al. 2012[82] suggest that Shep may be a tissue-specific factor interacting with architectural  
545 proteins in the central nervous system. The enrichment Shep in the central nervous system is even less  
546 extreme than the enrichment we observe of CP190 (a known interaction partner of ZIPC, one of our  
547 maternal expression associated motifs) in ovaries, suggesting that CP190 could also qualify as tissue-  
548 specific. Alternatively, the polyploid nature of nurse cells and the extensive and rapid transcription that  
549 occurs in these cells may instead provide an extreme enrichment of the common architectural proteins,  
550 without the need for stage or tissue specific architectural proteins.

551 Our results show that regulation in ovaries is accomplished primarily through architectural proteins that  
552 establish general regions of open chromatin. This process can turn on a large percentage of the genome,  
553 without the need to maintain specific motifs within specific genes. However, this leaves us with the  
554 question of how the stage 2 mRNA content is so highly conserved across species overall[24], as  
555 regulation at the chromatin level would appear less precise than gene-specific regulation. Perhaps

556 regulatory control primarily at the level of chromatin provides redundancy to maintain transcription  
557 despite the gain or loss of individual binding sites. Alternatively, there could be other levels of regulatory  
558 control that we are unable to detect, with the signal from chromatin-level control being so strong during  
559 this time. The high level of conservation of maternal transcripts is also remarkable given the importance  
560 of post-transcriptional regulators at this stage[3,19,23,83], as it is not clear if conservation at the  
561 transcript level is necessary for conservation at the protein level.

## 562 **Zygotic Regulation**

563 Our examination of motifs that are associated with zygotic mRNA expression revealed several previously  
564 discovered motifs, including those that bind Zelda and GAGA factor (Trl). Additionally, several motifs are  
565 likely binding sites for other well-characterized developmental proteins (Table S1) which are sometimes  
566 highly localized in the embryo. If transcripts are produced in a spatially localized manner, they are  
567 necessarily not expressed in the entire embryo, and thus their signal may be more difficult to detect in  
568 our data from whole embryos. Overall, we observe few motifs at stage 5 that are conserved across  
569 species, in comparison to motifs for maternally deposited genes. However, the motifs that we do find at  
570 stage 5 tend to higher conservation within specific genes than the motifs we discover at stage 2. This  
571 highlights that it may be more important for specific genes to have precise signals after ZGA.

572 Additionally, in our zygotic analysis, we focused only transcripts that are present at stage 5 and do not  
573 have a maternal component, as many maternally deposited transcripts are still present at stage 5  
574 (roughly half of maternal transcripts are still present at this stage[8,30–32]). Because many maternal  
575 transcripts are still present, analysis of the total stage 5 transcriptome would largely recapitulate the  
576 stage 2 results, especially as stage 5 transcripts are much more likely to be expressed in specific spatio-  
577 temporal patterns, which to our whole-embryo analysis would appear as low or noisy signal. Our  
578 decision to remove transcripts with maternal deposition highlights the signals that are unique to stage 5,

579 but comes at the cost of an overall reduction in the number of genes available for analysis, resulting in  
580 higher false discovery rates for all motifs.

## 581 **Conclusions**

582 In this study, we examined regulatory elements associated with maternal transcripts present at stage 2  
583 of embryogenesis and zygotic transcripts present at stage 5 across species of *Drosophila*. At both stages,  
584 we found regulatory motifs that are conserved throughout the ~50 million years of divergence  
585 represented by these species, which speaks to a conservation of regulatory mechanisms across the  
586 genus. In general, the high degree of conservation in regulatory elements at the maternal stage and the  
587 zygotic stage, while different from one another, speaks to the critical nature of the complement of  
588 transcripts present to direct early embryogenesis. The differing patterns observed in the *obscura* group  
589 species (*D. pseudoobscura* and *D. persimilis*), and the regulatory basis of changes in transcript  
590 representation between species are the subject of ongoing study. At the maternal stage, we found many  
591 regulators that appear to be defining general regions of the genome to be transcribed via chromatin  
592 regulation through architectural proteins and likely at the level of TADs. Given the exceptionally high  
593 level of conservation of maternal transcript deposition, the relatively non-specific mechanism of  
594 maternal gene regulation appears contradictory. In contrast, we found zygotic regulatory elements to be  
595 considerably more gene-specific. The different patterns of regulation for transcripts present at these  
596 two stages of embryogenesis is consistent with the specific transcriptional contexts of these two  
597 genomes, with the non-specific mechanism active in highly transcriptionally active polyploid nurse cells  
598 in oogenesis in the mother, and the gene-specific mechanism acting in the zygote where transcription is  
599 often localized in time and space.

600

## 601 **Methods**

### 602 **Data Acquisition**

603 RNA-seq data utilized for this study was generated previously[24], and is available at NCBI/GEO at  
604 accession number GSE112858. This dataset contains RNA-Seq data from single embryos. Embryos were  
605 collected either at stage 2, representing a time point before zygotic genome activation, and at the end  
606 of stage 5, representing a time point after widespread zygotic genome activation. Embryos were  
607 collected from 14 species, however we only used the data from 11 (*D. simulans*, *D. sechellia*, *D.*  
608 *melanogaster*, *D. yakuba*, *D. erecta*, *D. ananassae*, *D. persimilis*, *D. willistoni*, *D. mojavensis*, *D. virilis*)  
609 due to annotation deficiencies in the remaining 3. GTF files and references genomes from previously  
610 sequenced species[28] were downloaded from Flybase[84].

611 To determine whether a gene would be labeled as 'off' or as 'on', the overall distribution of FPKMs was  
612 analyzed. For all species, for both stage 2 and stage 5, a bimodal distribution appeared, with one peak at  
613 0 and another at approximately  $e^{3.5}$ . The commonly used cutoff of FPKM=1[85,86] was chosen as it falls  
614 between these two distributions.

615 To determine which genes were orthologues, we used the FlyBase orthology table  
616 "gene\_orthologs\_fb\_2014\_06\_fixed.tsv".

### 617 **Sequence Selection**

618 Preliminary tests were performed to determine which regions were most likely to have regulatory  
619 elements. For each gene, several regions were extracted: 10kb upstream, 5kb upstream, 2kb upstream,  
620 1kb upstream, 500bp upstream, 5' UTR, total introns, total exons, and 3' UTR. For each region,  
621 boundaries were obtained from the appropriate GTF and sequences were extracted using BioPython

622 (Version 1.73,[87]). The 2kb upstream region showed the highest quality motifs (Fig S1), and thus were  
623 used for matching motifs in external databases, measuring motif overlap between species, analyzing  
624 motif position distributions, and GO analysis. For these analyses, featured in figures 1 through 3, UTRs  
625 were ignored as not every species had annotated UTRs.

## 626 **Motif Discovery**

627 We used HOMER[29] to discover motifs in test sets using the background sets as control FASTA files, test  
628 and background sets are defined below. Deviations from the default settings include the use of the -  
629 fasta flag to specify a custom background file. For stage 2 queries, the test FASTA files included genes  
630 that had a FPKM  $\geq 1$  at stage 2 while the control FASTA files included genes that had an FPKM  $< 1$ . For  
631 the stage 5 queries, the test FASTA files contained genes where the stage 5 FPKM  $\geq 1$  and the stage 2  
632 FPKM  $< 1$ , while the control FASTA files included genes whose stage 5 FPKM  $< 1$  and stage 2 FPKM  $< 1$ .  
633 Additionally, we used the -p flag to utilize our computational resources more efficiently. We used -  
634 norevopp flag in the case of strand-specific searches. Motif quality was evaluated based on the HOMER-  
635 outputted q-values.

636 To validate the HOMER output files we used MEME[33] v4.12.0 and RSAT[88]. MEME was run using-mod  
637 zoops -nmotifs 2 -minw 8 -maxw 12 -revcomp. The RSAT analysis uses the purge-sequences tool,  
638 followed by oligo-analysis using the following parameters: -lth occ\_sig 0 -uth rank 5000 -return  
639 occ,proba,rank -2str -noov -quick\_if\_possible -seqtype dna -l 8, followed by pattern-assembly using the  
640 following parameters: -v 1 -subst 1 -toppat 5000 -2str, followed by matrix-from-patterns using the  
641 following parameters: -v 1 -logo -min\_weight 5 -flanks 2 -max\_asmb\_nb 10 -uth Pval 0.00025 -bginput -  
642 markov 0 -o purged\_result.

## 643 **Stage-specific gene analysis**

644 For analyses of zygotic transcripts, such as the motif analysis, we defined genes as being zygotic-only if  
645 they were off at stage 2 (FPKM <1) and on at stage 5 (FPKM >1), for N=10,215 genes across all species. It  
646 is necessary to impose such a restriction, as a large percentage (approximately 85%) of genes that are  
647 zygotically expressed were also maternally deposited, and analysis of stage 5 regulatory mechanisms  
648 would be confounded the signal of stage 2 genes. For analyses of maternal-only transcripts, we define  
649 maternal only if they are on at stage 2 (FPKM >1) and off at stage 5 (FPKM <1). As the class of maternal-  
650 only genes is very small (N=3194 across all species), we were unable to obtain results for some analyses  
651 such as the motif content detection and GO analyses for this group of genes.

## 652 **Motif Sharing**

653 To determine whether motifs were shared between species, the HOMER-formatted motifs were  
654 converted to meme-formatted motifs using chem2meme from the MEME Suit[33]. Tomtom, also from  
655 the MEME Suit, was then used to find matching motifs, using default parameters. For a motif to be  
656 considered shared with another species, the Tomtom output threshold of  $\alpha = .05$  was used. this  
657 technique was used to calculate the similarity of motifs found in different species, as well as to evaluate  
658 the similarity of different motif discovery strategies using MEME, RSAT, or HOMER with alternative  
659 parameters.

660 To refine the results of shared motifs, we applied an additional quality cutoff. For stage 2, motifs were  
661 first filtered for a q-value of less than  $1e-100$ , and for stage 5, motifs were first filtered for a q-value of  
662  $1e-10$ . The difference in the cutoffs used at the two different stages was due to the differences in the  
663 overall distribution of q-values for these stages due to a reduced number of zygotic-only genes (see  
664 zygotic-only motifs above).

665 Because sharing was calculated on a by-species basis, it is possible that one species has a motif that  
666 meets the criteria for being shared among all other species while other species' version of that same  
667 motif failing to meet the criteria. This can occur, for example, when a motif is an intermediary version of  
668 two motifs that fall just outside the cutoff.

669 To find proteins that bind to the discovered motifs, we used Tomtom to query JASPAR and Combined  
670 Drosophila Databases using the default parameters[89].

### 671 **Motif Position and Count**

672 Motif position was determined by using the scanMotifGenomeWide tool to in the HOMER package.  
673 Queries were performed by scanning the discovered motifs against the fasta files for each gene. The 5'  
674 boundary of the motif was used as the motif position. For the motif counts per gene used in many  
675 downstream analyses analysing motif position distributions, GO analysis, GC content analysis, and motif  
676 strand analysis. We used this output and counted the occurrence of a given motif in the target region.  
677 To quantify positional distribution similarity, we used the stats.anderson\_ksamp function from the scipy  
678 library V1.2.1[90]. Distributions were considered to be different at  $\alpha = .05$  after Bonferroni correction.

### 679 **Transcript Enrichment by Tissue**

680 Expression data for various adult tissues was downloaded from modENCODE[57]. To compare  
681 enrichment for transcripts with different magnitudes of abundance, we applied an additional  
682 normalization. For each transcript, transcript levels in FPKMs were divided by a scaling factor equal to  
683 the average of the expression levels in ovaries. This normalization preserves the relative abundances  
684 within each transcript, but allows for visualization of transcript levels with dramatically different overall  
685 expression levels.

## 686 **Housekeeping Gene Identification**

687 To compare the enrichment of the discovered motifs in maternally deposited genes versus  
688 housekeeping genes, we identified housekeeping genes using modENCODE data [57]. Housekeeping  
689 genes were defined as having expression in each of the following tissue types: larval CNS, larval ovaries,  
690 male larval gonads, male reproductive tracts, adult midguts, adult heads. In addition, putative  
691 housekeeping genes needed expression levels of greater than 1 FPKM in our stage 2 and stage 5 dataset  
692 in *Drosophila melanogaster*.

## 693 **Expression by Position**

694 *D. melanogaster* expression data by position was downloaded from modENCODE[57] for several tissue  
695 types. Positions for each motif was determined as previously described in the Motif Position and Count  
696 section above. For each instance of the motif of interest, we determined expression values in area from  
697 -10kb to +10kb. Transcript abundance in FPKMs were then normalized by the average FPKM reported on  
698 the track.

## 699 **GO Analysis**

700 We used the R package clusterProfiler 3.10.1[51] and the org.Dm.eg.db 3.7.0[91] dictionary to perform  
701 gene ontology (GO) analysis. For the stage 2 comparison, we generated a test set of the melanogaster  
702 gene names for every gene in our dataset that was maternally deposited in at least any 7 of our species,  
703 and performed an enrichment analysis using enrichGO's default parameters using a background set of  
704 all *D. melanogaster* genes. For the stage 5 comparison, we generated a test set of the *D. melanogaster*  
705 gene names for which at least two orthologues in our dataset showed zygotic-only expression (see  
706 Zygotic-only motifs section above for definition). This threshold approximates the percent of the



707 genome that we observed to be zygotic-only. We then performed an enrichment analysis using  
708 enrichGO's default parameters using a background set of *D. melanogaster* genes that are not maternally  
709 deposited in at least two species. This analysis therefore specifically examines the zygotically activated  
710 genes in the context of genes that are "off" at stage 2 ( FPKM<1 at this stage). For our analysis of stage 2  
711 motifs, we generated a test set for each motif consisting of genes that contained that motif in at least  
712 two species and were maternally deposited (FPKM > 1) in at least two species. We then performed an  
713 enrichment analysis using enrichGO's default parameters using a background set of all *D. melanogaster*  
714 genes. For our analysis of stage 5 motifs, we generated a test set for each motif using genes that were  
715 represented by transcripts >1 FPKM at stage 5 in at least two species and had the motif of interest in at  
716 least two species. We then performed an enrichment analysis using enrichGO's default parameters  
717 using a background set of *D. melanogaster* genes that were represented by transcripts >1 FPKM at stage  
718 5. To visualize our results, we employed the dotplot method for enrichGO objects, also from the  
719 clusterProfiler package. For each motif, the top 3 GO terms were identified and added to the y-axis  
720 labels. Whenever any GO category from another motif was identified as statistically significant ( $\alpha = .05$ ),  
721 that GO category was shaded appropriately.

722 To discover motifs associated with particular GO categories, we generated a list of genes that were both  
723 maternally deposited and associated with each GO term of interest, as well as a list of genes that were  
724 maternally deposited but not associated with the GO term of interest. For each GO term, we ran  
725 HOMER using the same parameters as the initial motif discovery, using the genes associated with the  
726 GO term as the test list and the genes not associated with the GO term as the background. We restricted  
727 this analysis to the upstream regions of *Drosophila melanogaster* genes.

## 728 **Model Fitting**

729 Logistic regression was performed using the “glm” function in R, using the logit link function. As inputs,  
730 we used the list of motifs generated from HOMER and their counts as described in the “Motif Position  
731 and Count” section above. To avoid redundant motifs in our model, only motifs of size 10 were  
732 considered. To evaluate the strand-specificity of motifs, we compared two generalized linear models  
733 using the formulas indicated in S1\_Model\_Generation.pdf. To identify the most important motifs, the R  
734 function stepAIC from the MASS library 7.3-51.4[92] was used to find generate an ordered list of motifs.  
735 The base model used contained no additional features (chromatin state, etc). StepAIC was run 8 steps to  
736 generate a short list of motifs for evaluation.

### 737 **Analysis of physical clustering of co-expressed genes**

738 To evaluate the effect of gene cluster size on expression, we iterated through each species for both  
739 stage 2 and stage 5 and assigned sizes of co-expressed gene clusters on the chromosome, based on how  
740 many adjacent genes were coexpressed, resulting in cluster size frequencies for each genome. Errors  
741 were calculated using 95% confidence interval for a two-tailed binomial distribution.

742 To compare the clustering of different datasets with varying percents of “on” genes, we employed the  
743 Wald–Wolfowitz runs test.

### 744 **Tissue-specific RNA Levels**

745 modENCODE tissue profiles[53] were downloaded from flybase.org . Flyatlas2 tissue profiles were  
746 downloaded from <http://flyatlas.gla.ac.uk/FlyAtlas2/>[54].

### 747 **Gene length**

748 To determine gene length, we examined the relevant line of the appropriate .GFF file and took the  
749 difference between the end and the start positions.

## 750 **Distance between genes**

751 To determine the distance **between** genes, we look at the appropriate .GFF file and took the difference  
752 of positions between adjacent genes from transcription start site (TSS) to TSS.

## 753 **Maternal deposition rates as compared to gene length, distance, and orientation**

754 Genes were binned by category and by either distance or length. For the top plot, 150 bins of 70bp  
755 width were used. For the bottom plot, 60 bins of 70bp width were used and bins with fewer than 6  
756 genes were disregarded. confidence intervals were calculated using the binomial distribution with  $\alpha =$   
757 .05 after Bonferroni.

## 758 **GC content**

759 GC content levels associated with each gene were evaluated by calculating the number of GC  
760 nucleotides within a sliding window of size 50bp for each of 1950 window positions to cover the  
761 upstream 2kb of each gene. To evaluate the first bin of each gene, the region from -1bp to -50bp was  
762 extracted, and the number of G and C nucleotides was counted. The result was divided by 50 to get the  
763 %GC for this window. To calculate the GC content for the next bin, this process was repeated on the  
764 region from -2bp to -51bp. Each bin had its GC content evaluated this way until the final bin of -451bp to  
765 -500bp. To evaluate how closely a particular upstream region resembled a maternally deposited-like  
766 distribution or a non maternally deposited-like distribution for the purposes of modeling, we calculated  
767 the average GC content for each position of maternally deposited, and not maternally deposited genes.  
768 Then for each gene, we measured the correlation between the GC content and that of both category

769 averages. We used the difference in these correlations as a metric to evaluate similarity in GC content  
770 for each gene.

## 771 Acknowledgements

772 We would like to thank Joel Atallah for his work on the original dataset, Gizem Kalay, Anna Feitzinger,  
773 and Emily Cartwright for comments on the manuscript, and all members of the Lott Lab for feedback.

## 774 References

- 775
- 776 1. Driever W, Nüsslein-Volhard C. The bicoid protein determines position in the *Drosophila* embryo in  
777 a concentration-dependent manner. *Cell*. 1988;54: 95–104.
  - 778 2. Lécuyer E, Yoshida H, Parthasarathy N, Alm C, Babak T, Cerovina T, et al. Global analysis of mRNA  
779 localization reveals a prominent role in organizing cellular architecture and function. *Cell*. 2007;131:  
780 174–187.
  - 781 3. Vastenhouw NL, Cao WX, Lipshitz HD. The maternal-to-zygotic transition revisited. *Development*.  
782 2019;146. doi:10.1242/dev.161471
  - 783 4. Schulz KN, Harrison MM. Mechanisms regulating zygotic genome activation. *Nat Rev Genet*.  
784 2019;20: 221–234.
  - 785 5. Ventos-Alfonso A, Ylla G, Belles X. Zelda and the maternal-to-zygotic transition in cockroaches. *FEBS*  
786 *J*. 2019. doi:10.1111/febs.14856
  - 787 6. Navarro-Costa P, McCarthy A, Prudêncio P, Greer C, Guilgur LG, Becker JD, et al. Early programming  
788 of the oocyte epigenome temporally controls late prophase I transcription and chromatin  
789 remodelling. *Nat Commun*. 2016;7: 12331.
  - 790 7. Mische S, Li M, Serr M, Hays TS. Direct observation of regulated ribonucleoprotein transport across  
791 the nurse cell/oocyte boundary. *Mol Biol Cell*. 2007;18: 2254–2263.
  - 792 8. Tadros W, Westwood JT, Lipshitz HD. The mother-to-child transition. *Dev Cell*. 2007;12: 847–849.
  - 793 9. Liang H-L, Nien C-Y, Liu H-Y, Metzstein MM, Kirov N, Rushlow C. The zinc-finger protein Zelda is a  
794 key activator of the early zygotic genome in *Drosophila*. *Nature*. 2008;456: 400–403.
  - 795 10. Harrison MM, Li X-Y, Kaplan T, Botchan MR, Eisen MB. Zelda binding in the early *Drosophila*  
796 *melanogaster* embryo marks regions subsequently activated at the maternal-to-zygotic transition.  
797 *PLoS Genet*. 2011;7: e1002266.

- 798 11. Akam M. The molecular basis for metamerism in the *Drosophila* embryo. *Development*.  
799 1987;101: 1–22.
- 800 12. Ingham PW. The molecular genetics of embryonic pattern formation in *Drosophila*. *Nature*.  
801 1988;335: 25–34.
- 802 13. Tadros W, Goldman AL, Babak T, Menzies F, Vardy L, Orr-Weaver T, et al. SMAUG is a major  
803 regulator of maternal mRNA destabilization in *Drosophila* and its translation is activated by the PAN  
804 GU kinase. *Dev Cell*. 2007;12: 143–155.
- 805 14. Benoit B, He CH, Zhang F, Votruba SM, Tadros W, Westwood JT, et al. An essential role for the RNA-  
806 binding protein Smaug during the *Drosophila* maternal-to-zygotic transition. *Development*.  
807 2009;136: 923–932.
- 808 15. Laver JD, Li X, Ray D, Cook KB, Hahn NA, Nabeel-Shah S, et al. Brain tumor is a sequence-specific  
809 RNA-binding protein that directs maternal mRNA clearance during the *Drosophila* maternal-to-  
810 zygotic transition. *Genome Biol*. 2015;16: 94.
- 811 16. Bushati N, Stark A, Brennecke J, Cohen SM. Temporal reciprocity of miRNAs and their targets during  
812 the maternal-to-zygotic transition in *Drosophila*. *Curr Biol*. 2008;18: 501–506.
- 813 17. Becalska AN, Gavis ER. Lighting up mRNA localization in *Drosophila* oogenesis. *Development*.  
814 2009;136: 2493–2503.
- 815 18. Clark A, Meignin C, Davis I. A Dynein-dependent shortcut rapidly delivers axis determination  
816 transcripts into the *Drosophila* oocyte. *Development*. 2007;134: 1955–1965.
- 817 19. Barckmann B, Simonelig M. Control of maternal mRNA stability in germ cells and early embryos.  
818 *Biochim Biophys Acta*. 2013;1829: 714–724.
- 819 20. Cui J, Sackton KL, Horner VL, Kumar KE, Wolfner MF. Wispy, the *Drosophila* homolog of GLD-2, is  
820 required during oogenesis and egg activation. *Genetics*. 2008;178: 2017–2029.
- 821 21. Benoit P, Papin C, Kwak JE, Wickens M, Simonelig M. PAP- and GLD-2-type poly(A) polymerases are  
822 required sequentially in cytoplasmic polyadenylation and oogenesis in *Drosophila*. *Development*.  
823 2008;135: 1969–1979.
- 824 22. Sallés FJ, Lieberfarb ME, Wreden C, Gergen JP, Strickland S. Coordinate initiation of *Drosophila*  
825 development by regulated polyadenylation of maternal messenger RNAs. *Science*. 1994;266: 1996–  
826 1999.
- 827 23. Temme C, Simonelig M, Wahle E. Deadenylation of mRNA by the CCR4-NOT complex in *Drosophila*:  
828 molecular and developmental aspects. *Front Genet*. 2014;5: 143.
- 829 24. Atallah J, Lott SE. Evolution of maternal and zygotic mRNA complements in the early *Drosophila*  
830 embryo. *PLoS Genet*. 2018;14: e1007838.
- 831 25. Bownes M. A photographic study of development in the living embryo of *Drosophila melanogaster*.  
832 *J Embryol Exp Morphol*. 1975;33: 789–801.

- 833 26. Campos-Ortega JA, Hartenstein V. *The Embryonic Development of Drosophila melanogaster*.  
834 Springer, Berlin, Heidelberg; 1985.
- 835 27. Nègre N, Brown CD, Ma L, Bristow CA, Miller SW, Wagner U, et al. A cis-regulatory map of the  
836 *Drosophila* genome. *Nature*. 2011;471: 527–531.
- 837 28. Clark AG, Eisen MB, Smith DR, Bergman CM, Oliver B, Markow TA, et al. Evolution of genes and  
838 genomes on the *Drosophila* phylogeny. *Nature*. 2007;450: 203–218.
- 839 29. Heinz S, Benner C, Spann N, Bertolino E, Lin YC, Laslo P, et al. Simple combinations of lineage-  
840 determining transcription factors prime cis-regulatory elements required for macrophage and B cell  
841 identities. *Mol Cell*. 2010;38: 576–589.
- 842 30. De Renzis S, Elemento O, Tavazzo S, Wieschaus EF. Unmasking activation of the zygotic genome  
843 using chromosomal deletions in the *Drosophila* embryo. *PLoS Biol*. 2007;5: e117.
- 844 31. Thomsen S, Anders S, Janga SC, Huber W, Alonso CR. Genome-wide analysis of mRNA decay  
845 patterns during early *Drosophila* development. *Genome Biol*. 2010;11: R93.
- 846 32. Lott SE, Villalta JE, Zhou Q, Bachtrog D, Eisen MB. Sex-specific embryonic gene expression in species  
847 with newly evolved sex chromosomes. *PLoS Genet*. 2014;10: e1004159.
- 848 33. Bailey TL, Boden M, Buske FA, Frith M, Grant CE, Clementi L, et al. MEME SUITE: tools for motif  
849 discovery and searching. *Nucleic Acids Res*. 2009;37: W202–8.
- 850 34. Ramírez F, Bhardwaj V, Arrigoni L, Lam KC, Grüning BA, Villaveces J, et al. High-resolution TADs  
851 reveal DNA sequences underlying genome organization in flies. *Nat Commun*. 2018;9: 189.
- 852 35. Zabidi MA, Arnold CD, Schernhuber K, Pagani M, Rath M, Frank O, et al. Enhancer-core-promoter  
853 specificity separates developmental and housekeeping gene regulation. *Nature*. 2015;518: 556–  
854 559.
- 855 36. Chen K, Johnston J, Shao W, Meier S, Staber C, Zeitlinger J. A global change in RNA polymerase II  
856 pausing during the *Drosophila* midblastula transition. *Elife*. 2013;2: e00861.
- 857 37. Liu MM, Davey JW, Jackson DJ, Blaxter ML, Davison A. A conserved set of maternal genes? Insights  
858 from a molluscan transcriptome. *Int J Dev Biol*. 2014;58: 501–511.
- 859 38. Ghavi-Helm Y. Functional consequences of chromosomal rearrangements on gene expression: not  
860 so deleterious after all? *J Mol Biol*. 2019. doi:10.1016/j.jmb.2019.09.010
- 861 39. Matsukage A, Hirose F, Yoo M-A, Yamaguchi M. The DRE/DREF transcriptional regulatory system: a  
862 master key for cell proliferation. *Biochim Biophys Acta*. 2008;1779: 81–89.
- 863 40. Yang J, Ramos E, Corces VG. The BEAF-32 insulator coordinates genome organization and function  
864 during the evolution of *Drosophila* species. *Genome Res*. 2012;22: 2199–2207.
- 865 41. Nègre N, Brown CD, Shah PK, Kheradpour P, Morrison CA, Henikoff JG, et al. A comprehensive map  
866 of insulator elements for the *Drosophila* genome. *PLoS Genet*. 2010;6: e1000814.

- 867 42. Maksimenko O, Bartkuhn M, Stakhov V, Herold M, Zolotarev N, Jox T, et al. Two new insulator  
868 proteins, Pita and ZIPIC, target CP190 to chromatin. *Genome Res.* 2015;25: 89–99.
- 869 43. Li J, Gilmour DS. Distinct mechanisms of transcriptional pausing orchestrated by GAGA factor and  
870 M1BP, a novel transcription factor. *EMBO J.* 2013;32: 1829–1841.
- 871 44. Levine M. Paused RNA polymerase II as a developmental checkpoint. *Cell.* 2011;145: 502–511.
- 872 45. Benyajati C, Mueller L, Xu N, Pappano M, Gao J, Mosammaparast M, et al. Multiple isoforms of  
873 GAGA factor, a critical component of chromatin structure. *Nucleic Acids Res.* 1997;25: 3345–3353.
- 874 46. Tsai S-Y, Chang Y-L, Swamy KBS, Chiang R-L, Huang D-H. GAGA factor, a positive regulator of global  
875 gene expression, modulates transcriptional pausing and organization of upstream nucleosomes.  
876 *Epigenetics Chromatin.* 2016;9: 32.
- 877 47. Granok H, Leibovitch BA, Shaffer CD, Elgin SC. Chromatin. Ga-ga over GAGA factor. *Curr Biol.*  
878 1995;5: 238–241.
- 879 48. Harrison MM, Botchan MR, Cline TW. Grainyhead and Zelda compete for binding to the promoters  
880 of the earliest-expressed *Drosophila* genes. *Dev Biol.* 2010;345: 248–255.
- 881 49. Ohler U, Liao G-C, Niemann H, Rubin GM. Computational analysis of core promoters in the  
882 *Drosophila* genome. *Genome Biol.* 2002;3: RESEARCH0087.
- 883 50. Lis M, Walther D. The orientation of transcription factor binding site motifs in gene promoter  
884 regions: does it matter? *BMC Genomics.* 2016;17: 185.
- 885 51. Yu G, Wang L-G, Han Y, He Q-Y. clusterProfiler: an R package for comparing biological themes  
886 among gene clusters. *OMICS.* 2012;16: 284–287.
- 887 52. R Core Team. R: A Language and Environment for Statistical Computing. Vienna, Austria: R  
888 Foundation for Statistical Computing; 2014. Available: <http://www.R-project.org/>
- 889 53. Brown JB, Boley N, Eisman R, May GE, Stoiber MH, Duff MO, et al. Diversity and dynamics of the  
890 *Drosophila* transcriptome. *Nature.* 2014;512: 393–399.
- 891 54. Leader DP, Krause SA, Pandit A, Davies SA, Dow JAT. FlyAtlas 2: a new version of the *Drosophila*  
892 *melanogaster* expression atlas with RNA-Seq, miRNA-Seq and sex-specific data. *Nucleic Acids Res.*  
893 2018;46: D809–D815.
- 894 55. Vogel C, Marcotte EM. Insights into the regulation of protein abundance from proteomic and  
895 transcriptomic analyses. *Nat Rev Genet.* 2012;13: 227–232.
- 896 56. Graveley BR, Brooks AN, Carlson JW, Duff MO, Landolin JM, Yang L, et al. The developmental  
897 transcriptome of *Drosophila melanogaster*. *Nature.* 2011;471: 473–479.
- 898 57. modENCODE Consortium, Roy S, Ernst J, Kharchenko PV, Kheradpour P, Negre N, et al.  
899 Identification of functional elements and regulatory circuits by *Drosophila* modENCODE. *Science.*  
900 2010;330: 1787–1797.

- 901 58. Bauke A-C, Sasse S, Matzat T, Klämbt C. A transcriptional network controlling glial development in  
902 the *Drosophila* visual system. *Development*. 2015;142: 2184–2193.
- 903 59. Gurudatta BV, Yang J, Van Bortle K, Donlin-Asp PG, Corces VG. Dynamic changes in the genomic  
904 localization of DNA replication-related element binding factor during the cell cycle. *Cell Cycle*.  
905 2013;12: 1605–1615.
- 906 60. Ulianov SV, Khrameeva EE, Gavrilov AA, Flyamer IM, Kos P, Mikhaleva EA, et al. Active chromatin  
907 and transcription play a key role in chromosome partitioning into topologically associating domains.  
908 *Genome Res*. 2016;26: 70–84.
- 909 61. Hou C, Li L, Qin ZS, Corces VG. Gene density, transcription, and insulators contribute to the partition  
910 of the *Drosophila* genome into physical domains. *Mol Cell*. 2012;48: 471–484.
- 911 62. Barrett T, Wilhite SE, Ledoux P, Evangelista C, Kim IF, Tomashevsky M, et al. NCBI GEO: archive for  
912 functional genomics data sets--update. *Nucleic Acids Res*. 2013;41: D991–5.
- 913 63. Bradley JV. *Distribution-free statistical tests*. Prentice-Hall; 1968.
- 914 64. Artieri CG, Fraser HB. Transcript length mediates developmental timing of gene expression across  
915 *Drosophila*. *Mol Biol Evol*. 2014;31: 2879–2889.
- 916 65. Heyn P, Kircher M, Dahl A, Kelso J, Tomancak P, Kalinka AT, et al. The earliest transcribed zygotic  
917 genes are short, newly evolved, and different across species. *Cell Rep*. 2014;6: 285–292.
- 918 66. Zhang L, Kasif S, Cantor CR, Broude NE. GC/AT-content spikes as genomic punctuation marks. *Proc*  
919 *Natl Acad Sci U S A*. 2004;101: 16855–16860.
- 920 67. Naughton C, Avlonitis N, Corless S, Prendergast JG, Mati IK, Eijk PP, et al. Transcription forms and  
921 remodels supercoiling domains unfolding large-scale chromatin structures. *Nat Struct Mol Biol*.  
922 2013;20: 387–395.
- 923 68. Pedone F, Filetici P, Ballario P. Yeast RNA polymerase II transcription of circular DNA at different  
924 degrees of supercoiling. *Nucleic Acids Res*. 1982;10: 5197–5208.
- 925 69. Matsumoto K, Hirose S. Visualization of unconstrained negative supercoils of DNA on polytene  
926 chromosomes of *Drosophila*. *J Cell Sci*. 2004;117: 3797–3805.
- 927 70. Vlijm R, V D Torre J, Dekker C. Counterintuitive DNA Sequence Dependence in Supercoiling-Induced  
928 DNA Melting. *PLoS One*. 2015;10: e0141576.
- 929 71. Tadros W, Lipshitz HD. The maternal-to-zygotic transition: a play in two acts. *Development*.  
930 2009;136: 3033–3042.
- 931 72. Van Bortle K, Nichols MH, Li L, Ong C-T, Takenaka N, Qin ZS, et al. Insulator function and topological  
932 domain border strength scale with architectural protein occupancy. *Genome Biol*. 2014;15: R82.
- 933 73. Ghavi-Helm Y, Jankowski A, Meiers S, Viales RR, Korbelt JO, Furlong EEM. Highly rearranged  
934 chromosomes reveal uncoupling between genome topology and gene expression. *Nat Genet*.  
935 2019;51: 1272–1282.



- 936 74. Despang A, Schöpflin R, Franke M, Ali S, Jerković I, Paliou C, et al. Functional dissection of the Sox9-  
937 Kcnj2 locus identifies nonessential and instructive roles of TAD architecture. *Nat Genet.* 2019;51:  
938 1263–1271.
- 939 75. Jambor H, Surendranath V, Kalinka AT, Mejstrik P, Saalfeld S, Tomancak P. Systematic imaging  
940 reveals features and changing localization of mRNAs in *Drosophila* development. *Elife.* 2015;4.  
941 doi:10.7554/eLife.05003
- 942 76. Dej KJ, Spradling AC. The endocycle controls nurse cell polytene chromosome structure during  
943 *Drosophila* oogenesis. *Development.* 1999;126: 293–303.
- 944 77. Zhimulev IF, Belyaeva ES, Semeshin VF, Koryakov DE, Demakov SA, Demakova OV, et al. Polytene  
945 Chromosomes: 70 Years of Genetic Research. *International Review of Cytology.* Academic Press;  
946 2004. pp. 203–275.
- 947 78. Abruzzi K, Chen X, Nagoshi E, Zadina A, Rosbash M. Chapter Seventeen - RNA-seq Profiling of Small  
948 Numbers of *Drosophila* Neurons. In: Sehgal A, editor. *Methods in Enzymology.* Academic Press;  
949 2015. pp. 369–386.
- 950 79. Liang J, Lacroix L, Gamot A, Cuddapah S, Queille S, Lhoumaud P, et al. Chromatin  
951 immunoprecipitation indirect peaks highlight long-range interactions of insulator proteins and Pol II  
952 pausing. *Mol Cell.* 2014;53: 672–681.
- 953 80. Phillips-Cremins JE, Corces VG. Chromatin insulators: linking genome organization to cellular  
954 function. *Mol Cell.* 2013;50: 461–474.
- 955 81. Matzat LH, Lei EP. Surviving an identity crisis: a revised view of chromatin insulators in the  
956 genomics era. *Biochim Biophys Acta.* 2014;1839: 203–214.
- 957 82. Matzat LH, Dale RK, Moshkovich N, Lei EP. Tissue-specific regulation of chromatin insulator  
958 function. *PLoS Genet.* 2012;8: e1003069.
- 959 83. Vardy L, Orr-Weaver TL. Regulating translation of maternal messages: multiple repression  
960 mechanisms. *Trends Cell Biol.* 2007;17: 547–554.
- 961 84. Gramates LS, Marygold SJ, Santos GD, Urbano J-M, Antonazzo G, Matthews BB, et al. FlyBase at 25:  
962 looking to the future. *Nucleic Acids Res.* 2017;45: D663–D671.
- 963 85. Brooks MJ, Rajasimha HK, Roger JE, Swaroop A. Next-generation sequencing facilitates quantitative  
964 analysis of wild-type and Nrl(-/-) retinal transcriptomes. *Mol Vis.* 2011;17: 3034–3054.
- 965 86. Tao T, Zhao L, Lv Y, Chen J, Hu Y, Zhang T, et al. Transcriptome sequencing and differential gene  
966 expression analysis of delayed gland morphogenesis in *Gossypium australe* during seed  
967 germination. *PLoS One.* 2013;8: e75323.
- 968 87. Cock PJA, Antao T, Chang JT, Chapman BA, Cox CJ, Dalke A, et al. Biopython: freely available Python  
969 tools for computational molecular biology and bioinformatics. *Bioinformatics.* 2009;25: 1422–1423.
- 970 88. Medina-Rivera A, Defrance M, Sand O, Herrmann C, Castro-Mondragon JA, Delerce J, et al. RSAT  
971 2015: Regulatory Sequence Analysis Tools. *Nucleic Acids Res.* 2015;43: W50–6.

- 972 89. Khan A, Fornes O, Stigliani A, Gheorghe M, Castro-Mondragon JA, van der Lee R, et al. JASPAR 2018:  
973 update of the open-access database of transcription factor binding profiles and its web framework.  
974 Nucleic Acids Res. 2018;46: D260–D266.
- 975 90. Jones E, Oliphant T, Peterson P, Others. SciPy: Open source scientific tools for Python. Available:  
976 <http://www.scipy.org/>
- 977 91. Carlson M. org.Dm.eg.db: Genome wide annotation for Fly. 2018.
- 978 92. Venables WN, Ripley BD. Modern Applied Statistics with S. New York: Springer; 2002. Available:  
979 <http://www.stats.ox.ac.uk/pub/MASS4>

980

981

982

## 983 Figure Captions

984 **Table 1:** A summary of the top ranked motifs. HOMER was used to find motifs enriched in the 2kb  
985 windows upstream of maternally deposited genes (stage 2) and zygotically transcribed genes (stage 5).  
986 Sequence logo shows the consensus motif where the probability of each base is proportional to its  
987 representative character. P-value is given by HOMER. %target represents the percent of either  
988 maternally deposited or zygotically expressed genes that contain at least one instance of the motif.  
989 %background indicates the percent of all genes that contain this motif. Best match indicates protein  
990 with a previously identified binding site that mostly closely matches the discovered motif (see Methods).

991 **Fig 1:** Motifs associated with maternal deposition are largely shared across species, zygotic motifs are  
992 likely to be species-specific. For each analysis represented in A-D, motif enrichment was determined for  
993 each group of genes at each stage (all maternally deposited genes at stage 2; or zygotic genes at stage 5)  
994 separately in each species, then lists of enriched motifs at each stage were compared across species. For

995 stage 2 motifs, we required motifs to have a  $-\log$  qvalue  $> 100$ , while for stage 5 motifs we required  
996 motifs to have a  $-\log$  qvalue  $> 10$  (see Methods). (A, C) Percent of motif content in the upstream region  
997 that is found to be shared between species at stage 2 and stage 5, respectively. The number of species  
998 that share each motif is indicated by the color of the bar. Note that in stage 2, a large majority of motifs  
999 are shared in all (11 species) or almost all (9 or 10 species), with the exception of *D. pseudoobscura* and  
1000 *D. persimilis*, sister species that share common motifs between themselves but are different from the  
1001 rest of the species. Zygotic motifs identified at stage 5 are much more likely to be species specific or  
1002 shared by only a couple of species. (B, D) Number of motifs shared between each pair of species at stage  
1003 2 and stage 5, respectively. Comparisons of one species to itself indicate the total number of motifs that  
1004 fit quality criteria discovered in that species. Comparing the number of shared motifs between pairs of  
1005 species, there is some signal of the phylogeny in stage 2 (B), with *D. melanogaster* subgroup species  
1006 sharing more motifs in common with one another than they do with the more distantly related species,  
1007 and *D. pseudoobscura* and *D. persimilis* with the highest number of motifs in common but the most  
1008 differences from the remaining species. For stage 5 (D), apparent patterns include both the number of  
1009 species-specific motifs (diagonal) and less apparent phylogenetic structure. (E) Conservation of top  
1010 motifs in orthologous genes across species. Y-axis indicates all of the instances of the motif of interest  
1011 within the upstream region. Coloration represents how many species' orthologues also contain that  
1012 motif. In general, top motifs at the zygotic stage (stage 5) are more likely to be conserved in orthologous  
1013 genes at this stage. This sets up a contrast with parts A-D, where maternal deposition is broadly  
1014 associated with a shared set of motifs across species, but part E shows that orthologous maternal genes  
1015 are less likely to share a specific motif.

1016 **Fig 2:** Top GO terms show that motifs regulate broader set of genes at the maternal stage, and a more  
1017 specific set of developmentally associated genes at the zygotic stage. (A) GO terms associated with each  
1018 stage. Note that the set of identified GO categories does not overlap between stages. (B) GO terms

1019 associated with top motifs in stage 2, where a majority of motifs are associated with similar broad GO  
1020 categories (C) GO terms associated with top motifs in stage 5, some motifs are associated with the same  
1021 categories, some appear to be more specialized, with identified categories showing more specificity  
1022 than categories associated with stage 2

1023 **Fig 3:** Identified maternal regulators are ovary enriched, as is their effect on transcription (A) RNA levels  
1024 of putative binding proteins by tissue type. Transcript abundances within each gene have been  
1025 normalized such that the average abundance in ovaries is equal to 1. While identified maternal  
1026 regulators have regulatory functions in multiple tissue types, they are highly enriched in ovaries  
1027 compared to other tissues. (B) Average normalized expression levels versus proximity to motif by tissue  
1028 type. Normalization was performed by dividing each expression value by the average expression from  
1029 9.9-10kb away. While binding sites for identified maternal regulators are present in multiple tissues, the  
1030 effect on gene expression is stronger in ovaries compared to other tissues.

1031 **Fig 4:** Chromatin stage and maternal deposition. For the analyses in A and B, genes were categorized as  
1032 either expressed or not expressed (see Methods) and adjacent expressed genes were considered to be  
1033 clustered, with a cluster size equal to the number of constituent genes. (A) Physical clustering of  
1034 maternally deposited genes along the chromosome, in a representative species (*D. simulans*). The  
1035 shaded blue region represents the observed frequency of co-expressed maternal gene clusters of  
1036 various sizes. The red region represents the 95% CI constructed with 10,000 bootstrap iterations.  
1037 Maternal genes are co-expressed in clusters along the chromosome more often than expected, given  
1038 the percent of the genome that is transcribed at this stage. (B) Physical clustering of co-expressed genes  
1039 on chromosomes in various tissue types. In order to compensate for differing proportions of the  
1040 genome that are expressed in each tissue type, physical clustering was measured by performing a Wald-  
1041 Wolfowitz runs test and taking the z-score (see Methods). Maternally expressed genes, represented by  
1042 stage 2 embryos, show the highest proportion of physical clustering of co-expressed genes, though

1043 other tissues such as intestinal stem cells and larval CNS also have highly physically clustered co-  
1044 expressed genes. (C) Gene length by number of adjacent maternally expressed genes, "open" indicating  
1045 both adjacent genes are expressed, "border" indicating that one is expressed, and "closed" indicating  
1046 that neither are expressed. Genes that with more expressed neighbors are more likely to be maternally  
1047 deposited, regardless of length. Genes without expressed neighbors are less likely to be maternally  
1048 deposited, with the odds increasing as length increases. (D) Odds of maternal deposition versus distance  
1049 to the nearest upstream gene by upstream expression and strand. Distance is measured by from  
1050 transcription start site (TSS) to TSS. When the upstream gene is maternally deposited, odds of maternal  
1051 deposition are high, but decrease with distance regardless of strand. When the upstream gene is not  
1052 maternally deposited, odds of maternal deposition are low and have a strand-dependent relationship  
1053 with distance.

1054 **Fig 5:** Stage-specific genes are more likely to be different from their chromatin neighborhood. *D.*  
1055 *simulans* was chosen as a representative species. (A) Cluster size distribution of maternal-only genes  
1056 (green bars) compared with the expected frequencies based on the overall cluster size frequencies  
1057 observed at stage two (blue region). The expected frequencies are based on the distribution in Fig 4A  
1058 multiplied by a scale factor equal to the proportion of maternally deposited genes that are maternal-  
1059 only, with the shaded region representing a 95% confidence interval. (B) Cluster size distribution for  
1060 zygotic-only genes (green bars) compared with the expected frequencies based on the overall cluster  
1061 size frequencies observed at stage 5 (blue region) in a manner similar to Fig 5A. the shaded region  
1062 represents a 95% confidence interval. For both stages, stage-specific genes are more likely to be the  
1063 single gene (or one of a small number of genes) that are expressed where their neighboring genes are  
1064 not, representing small numbers of "on" genes in an "off" chromatin environment.

## 1065 Supporting Information Figure Captions

1066 **S1 Table:** A summary of the top ranked zygotic motifs. Motifs were selected if had enrichment if they  
1067 were enriched in the combined upstream regions of all species with a q-value < 1e-50 and a Tomtom  
1068 match to any motif in an existing database with q < .1. If there were more than one, the best two  
1069 matches to motifs in existing databases were reported in the Best Match column. Some motifs are  
1070 plausible binding sites for known embryonic regulators.

1071 **S1 Fig:** Distribution of motif qualities by location in a representative species in each stage. *D. ananassae*  
1072 was selected as a representative species. Motif qualities are given by the negative natural logarithm of  
1073 the q-value outputted by HOMER. High quality motifs enriched for stage 2 (A) are most likely to be  
1074 found in the 2kb upstream of a gene. Motifs for stage 5 are generally less high quality by this metric, and  
1075 while the highest quality tend to also be enriched 2kb upstream, some are enriched in 2kb upstream  
1076 regions of non-expressed genes or enriched in exons.

1077 **S2 Fig:** Representative positional distributions of motifs. Distributions for both maternally deposited  
1078 genes ("on") and non- maternally deposited genes ("off") are shown. (A) The positional distribution of  
1079 the DREF motif, which follows the same pattern as M1BP, Zipic, Ohler-6, and E-box, and many motifs  
1080 without identified factors that bind them. These motifs are found upstream of maternally deposited  
1081 genes (red), with a higher frequency closer to the transcription start site. They are not found with any  
1082 frequency in non-maternally deposited genes (blue). (B,C) Positional distribution patterns of some rare,  
1083 undocumented motifs. In both, we see that the motif is more enriched in maternally deposited genes  
1084 than in non-maternally deposited genes, but that the enrichment difference is less than those motifs  
1085 represented by (A) above. In (B), this motif is most highly enriched upstream, less enriched around the  
1086 transcription start site (TSS), and more highly enriched again downstream of the TSS (though less so  
1087 than upstream). In (C), we see the highest enrichment downstream of the TSS, with a dip in enrichment  
1088 around the TSS, and less enrichment upstream of the TSS than downstream

1089 **S3 Fig:** GC content of the region upstream of the TSS. GC content for each gene in a sliding window with  
1090 50bp width is summed for each gene in the category. (A) Maternally deposited genes. (B) Non-  
1091 maternally deposited genes. (C) Zygotic-only genes. Note the high number of genes with higher GC  
1092 content immediately upstream of maternally deposited genes, and the lower GC content upstream of  
1093 this GC-enriched region.

1094 **S4 Fig:** Low quality motifs are less likely to be shared across species. In a manner similar to figure 1 a  
1095 and b, we discovered motifs for each species at both stage 2 and stage 5 and evaluated what percent of  
1096 motifs were shared among species. Unlike the analysis described in figure 1 a and b, we did not apply a  
1097 quality filter.

1098 **S5 Fig:** GO-term specific motifs exist, but are not predictive of maternal deposition. The effect and p-  
1099 value column data are generated from a generalized linear models of the form [maternal deposition] ~  
1100 [motif presence], given a number of genes whose adjacent genes are expressed. Although the effect is  
1101 always positive, indicating a slight increase in maternal deposition rates for genes with this motif, the  
1102 high p-values indicate that these results are not statistically significant.

1103 **S6 Fig:** maternal deposition is a more important attribute for these genes than housekeeping. (A) within  
1104 non-housekeeping genes, the discovered motifs are much more common within maternally deposited  
1105 genes. Error bars represent 95% confidence intervals by the binomial distribution. P-values are  
1106 generated by the prop.test function in R. (B) genes labeled as maternally deposited are more likely to  
1107 contain these motifs than genes labeled as housekeeping. effects were calculated by generating a  
1108 generalized linear model in the form [presence of motif within genes] ~ [housekeeping or not] +  
1109 [maternally deposited or not]. Error bars represent standard error.

|         | Logo | log p-value | %Target | %Background | Best Match | Description                                                                                                                                                                  |
|---------|------|-------------|---------|-------------|------------|------------------------------------------------------------------------------------------------------------------------------------------------------------------------------|
|         |      | 2091        | 35.49%  | 12.32%      | DREF       | <ul style="list-style-type: none"> <li>• “Master key-like factor for cell proliferation” (Akio Matsukage et al. 2008)</li> <li>• Shares binding site with BEAF-32</li> </ul> |
|         |      | 2091        | 35.49%  | 12.32%      | BEAF-32    | <ul style="list-style-type: none"> <li>• Insulator (Yang, Ramos, and Corces 2012; Nègre et al. 2010)</li> <li>• Shares binding site with DREF</li> </ul>                     |
| Stage 2 |      | 1591        | 27.85%  | 9.42%       | M1BP       | <ul style="list-style-type: none"> <li>• Causes PolII to pause on the gene gene (Li and Gilmour 2013)</li> </ul>                                                             |
|         |      | 934         | 27.35%  | 12.73%      | ZIPIC      | <ul style="list-style-type: none"> <li>• Recruits insulator CP190 (Maksimenko et al. 2015).</li> </ul>                                                                       |
|         |      | 843         | 40.25%  | 23.98%      | Ohler-6    | <ul style="list-style-type: none"> <li>• Commonly found between TAD boundaries (Ramirez et al 2018)</li> </ul>                                                               |
|         |      | 692         | 20.13%  | 9.05%       | E-box      | <ul style="list-style-type: none"> <li>• Regulates gene expression</li> </ul>                                                                                                |
|         |      | 163         | 18.45%  | 8.77%       | Zld        | <ul style="list-style-type: none"> <li>• “master regulator of genome activation”</li> </ul>                                                                                  |
| Stage 5 |      | 84          | 35.74%  | 26.05%      | Trl        | <ul style="list-style-type: none"> <li>• Required for embryogenesis</li> <li>• Known to regulate developmental genes</li> </ul>                                              |
|         |      | 56          | 48.41%  | 39.9%       | Trl        | <ul style="list-style-type: none"> <li>• Required for embryogenesis</li> <li>• Known to regulate developmental genes</li> </ul>                                              |

Table 1



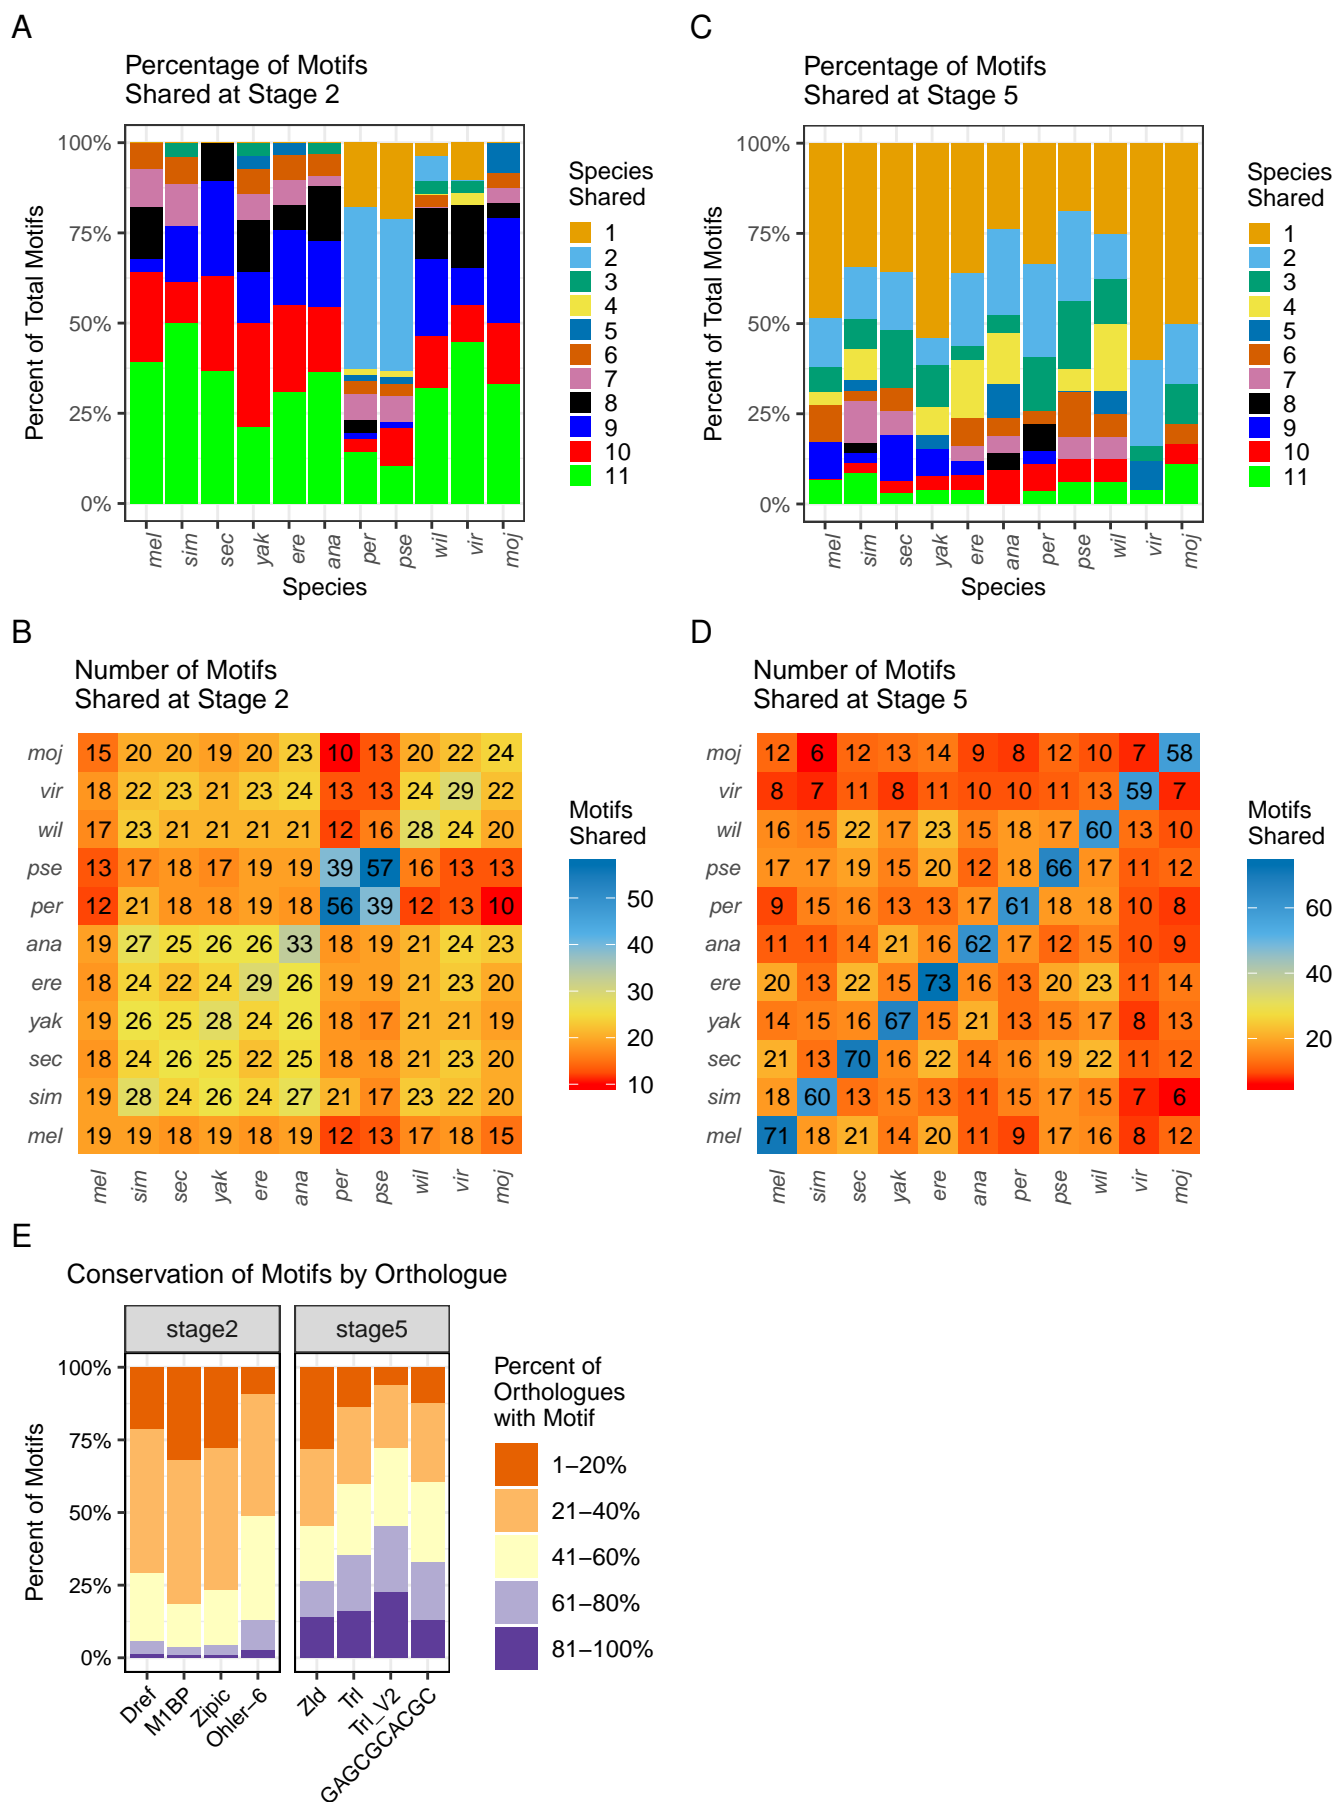

**Fig 1**

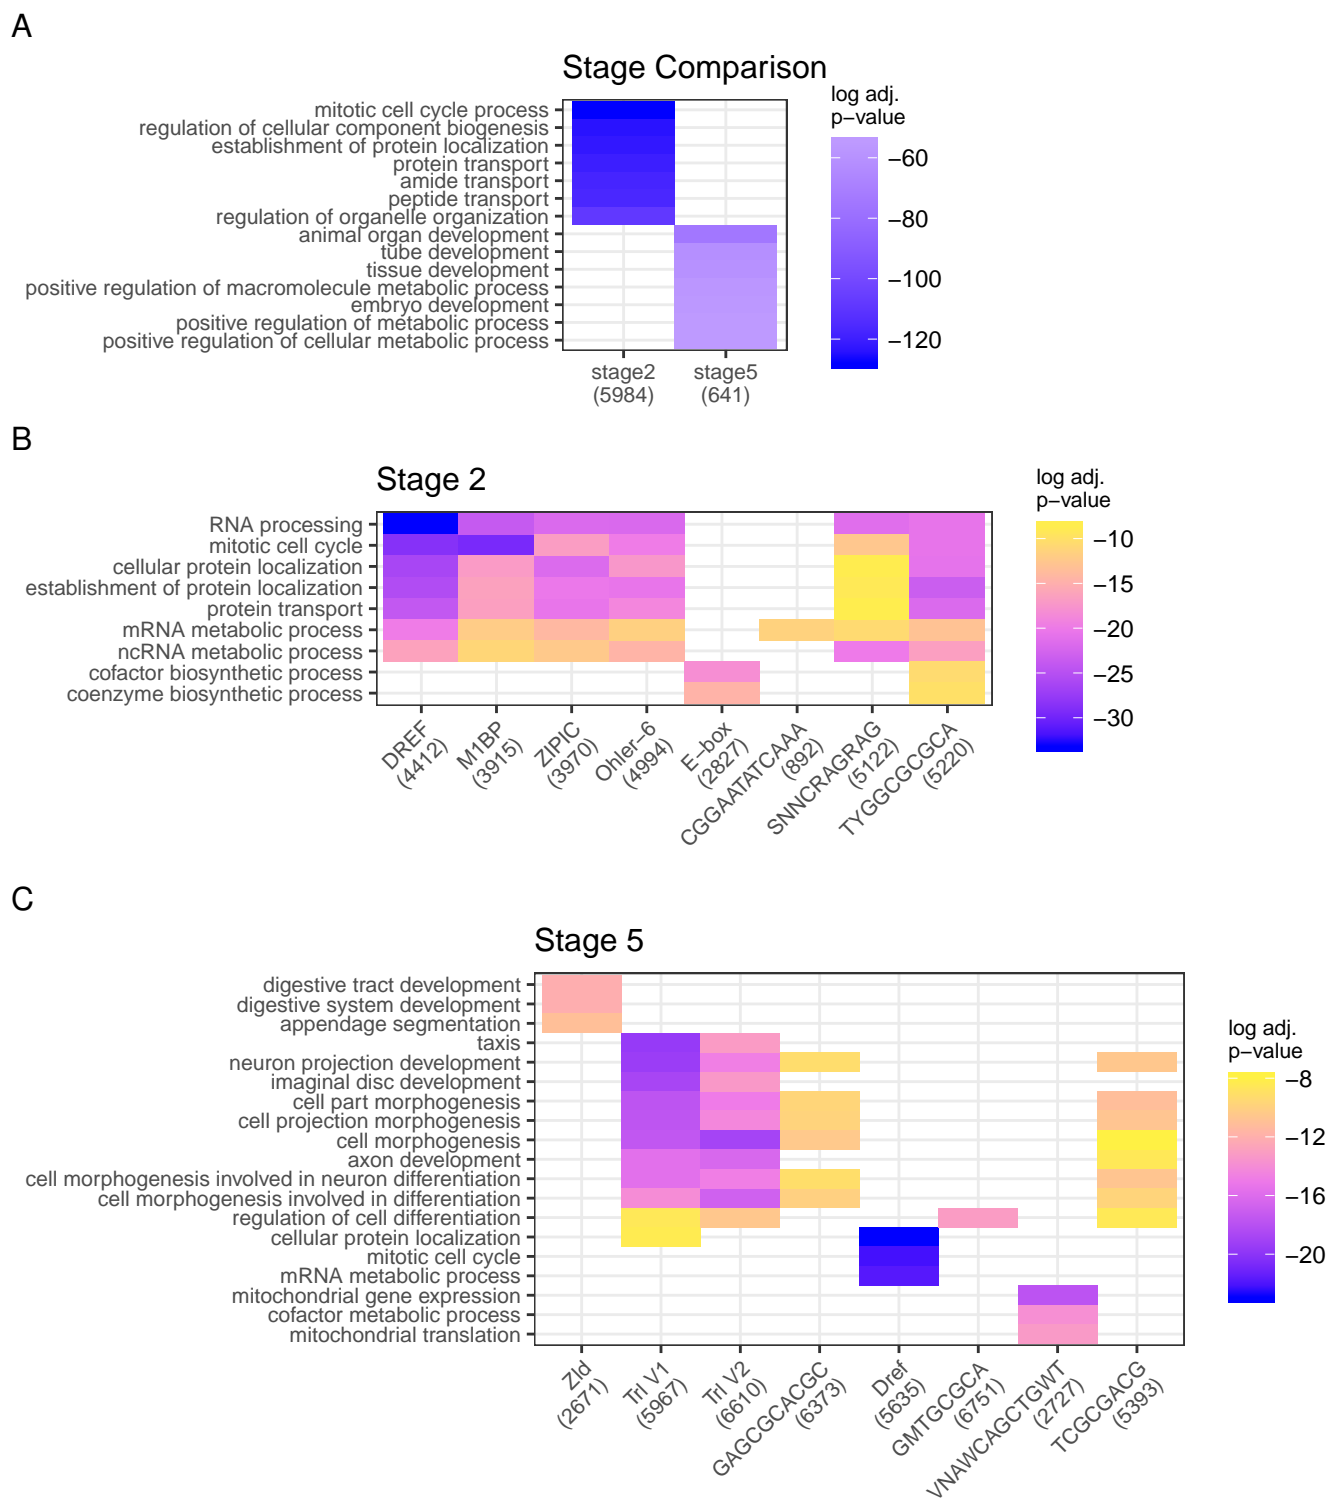

**Fig 2**

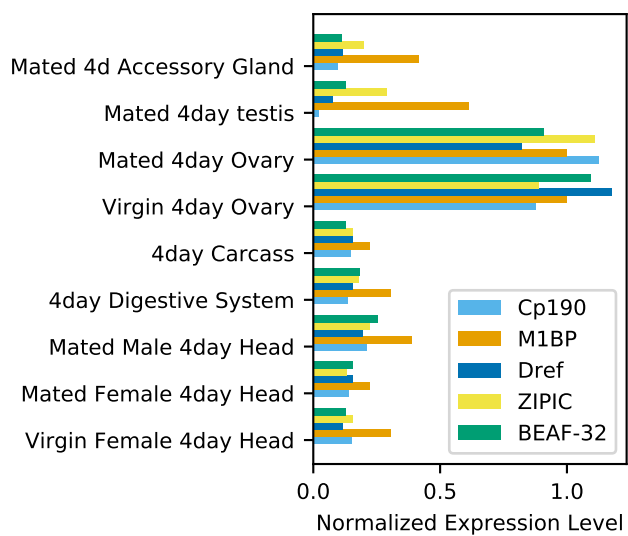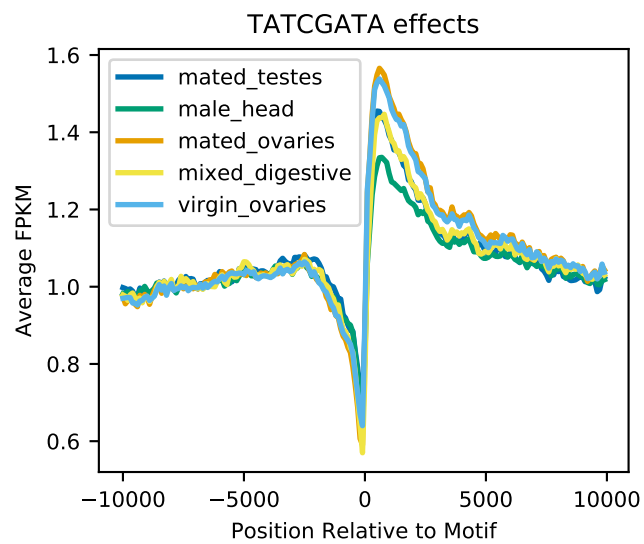

**Fig 3**

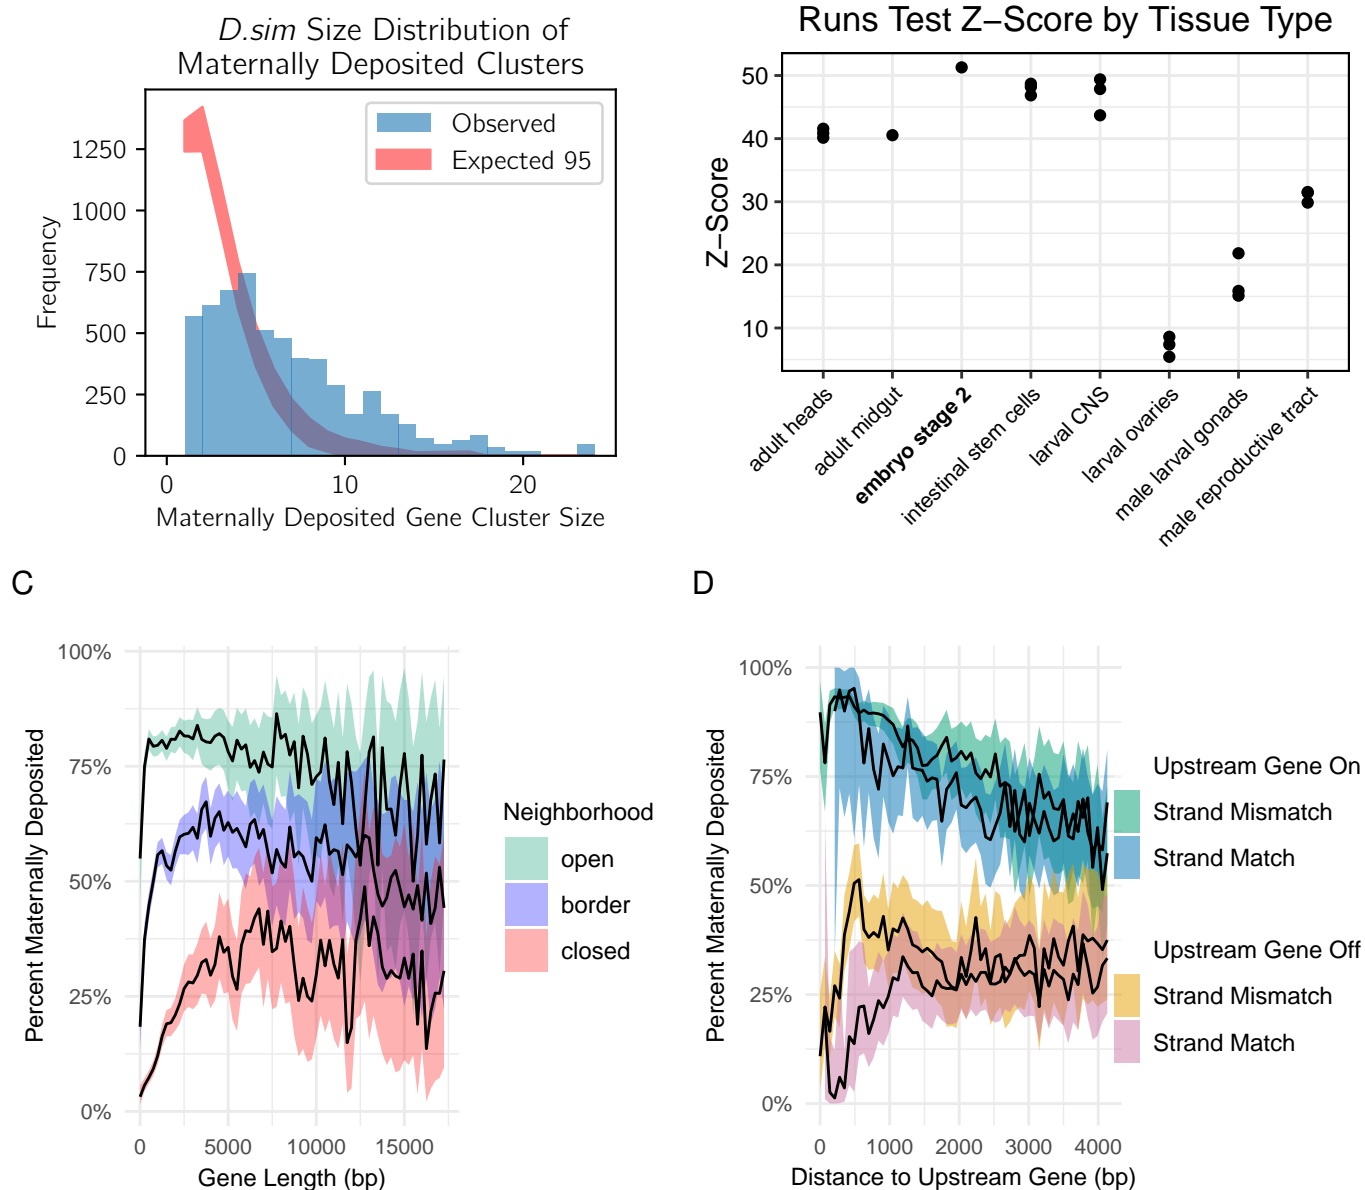

**Fig 4**

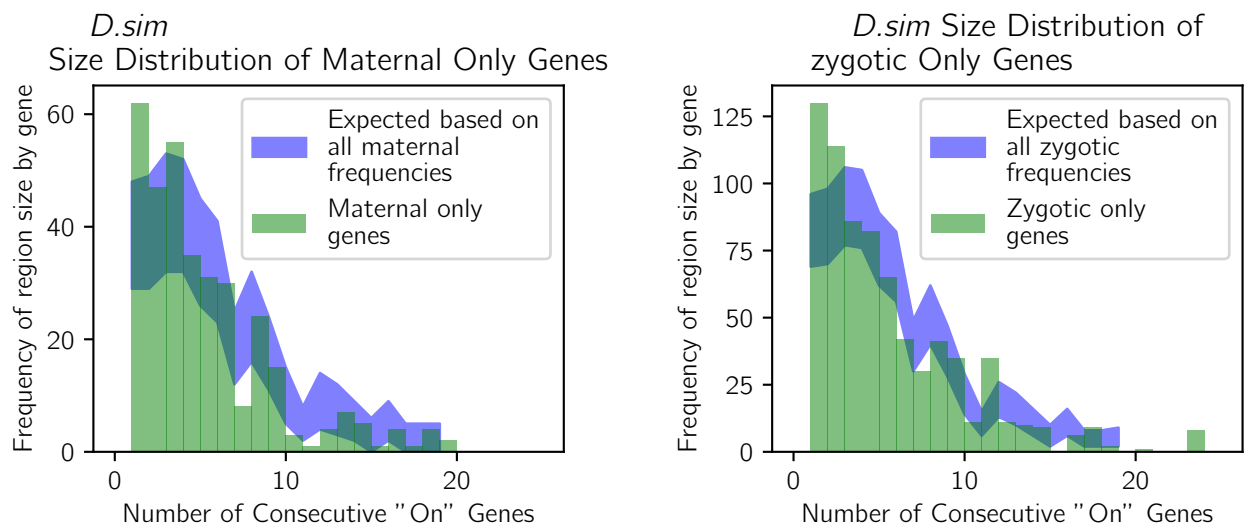

**Fig 5**
